# Supplementary material
Source: Royal Society of Chemistry journal article supplement (doi:10.1039/d6ee02588a)
Supplement: d6ee02588a1.pdf [file d6ee02588a1.pdf]

## Supporting Information

# Hydrogen-driven thermoelectric trigeneration for sustainable homes: Electricity, water, and heat

*Guoneng Li*<sup>a,#</sup>, *Xiao-Lei Shi*<sup>b,#</sup>, *Hongkun Lv*<sup>c</sup>, *Hongyi Tang*<sup>a</sup>, *Ya Wang*<sup>a</sup>, *Wenwen Guo*<sup>a</sup>, *Shaojun Liu*<sup>d</sup>, *Dan Zhao*<sup>e</sup>, *Zhi-Gang Chen*<sup>b,\*</sup>

<sup>a</sup>Department of Energy and Environment System Engineering, Zhejiang University of Science and Technology, Hangzhou 310023, China

<sup>b</sup>School of Chemistry and Physics, ARC Research Hub in Zero-emission Power Generation for Carbon Neutrality, and Centre for Materials Science, Queensland University of Technology, Brisbane, Queensland 4000, Australia

<sup>c</sup>State Grid Zhejiang Electric Power Research Institute, Hangzhou, 310014, China

<sup>d</sup>State Key Lab of Clean Energy Utilization, Zhejiang University, Hangzhou, 310027, China

<sup>e</sup>Department of Mechanical Engineering, College of Engineering, University of Canterbury, Private Bag 4800, Christchurch 8140, New Zealand

#Equal contribution

Email: [zhigang.chen@qut.edu.au](mailto:zhigang.chen@qut.edu.au) (Z.-G. Chen).

## Appendix A: Governing equations for the HTPP power generation

Enhanced heat collection *via* the impingement-driven thermal management architecture is captured by Equation (S1), and the corresponding thermal energy is quantified by Equation (S2). The maximum electric current, determined by Equation (S3), therefore leads to the highest attainable electrical power output.

$$\overline{Nu} = \left[ 1 + \left( \frac{H/D}{0.6\sqrt{f}} \right)^6 \right]^{-0.05} \cdot \sqrt{f} \cdot \frac{1 - 2.2\sqrt{f}}{1 + 0.2\left(\frac{H}{D} - 6\right)\sqrt{f}} Re^{2/3} Pr^{0.42}, \#(S1)$$

$$MQ_{TEM} = \frac{\overline{Nu} \cdot k_f}{D} \cdot A \cdot (T_f - T_{HC}), \#(S2)$$

$$Q_{TEM} = N \left[ (\alpha_p - \alpha_n) T_h I_{P_{max}} + k_p A_{leg} \frac{dT}{dz} \Big|_{z=L_0} + k_n A_{leg} \frac{dT}{dz} \Big|_{z=L_0} \right], \#(S3)$$

$\overline{Nu}$  is the average Nusselt number,  $H$  is the distance between the impinging jet orifice and the target surface (inner surface of the HC),  $D$  is the diameter of the impinging jet orifice,  $f$  is the ratio of the total area of the jet orifices with the area of the target surface,  $Re$  is the Reynolds number,  $Pr$  is Prandtl number,  $M$  is the number of TEM,  $Q_{TEM}$  is the thermal energy passing through the TEM,  $k_f$  is the thermal conductivity of the flue gas,  $A$  is the area of the target surface,  $T_f$  is the temperature of the flue gas,  $T_{HC}$  is the temperature of the target surface.  $N$  is the thermoelectric couple number of a TEM,  $\alpha_p$  is the p-type Seebeck coefficient,  $\alpha_n$  is the n-type Seebeck coefficient,  $T_h$  is the hot-side temperature,  $I_{P_{max}}$  is the maximum electrical current of the TEG,  $k_p$  is the thermal conductivity of the p-type leg,  $k_n$  is the thermal conductivity of the n-type leg,  $A_{leg}$  is the cross-sectional area of the leg,  $T$  is the local temperature at the coordinate of  $z$ ,  $L_0$  is the height of the leg.

## Appendix B

Equivalence ratio ( $\phi$ ) is a crucial parameter that must be controlled during combustion, and it is defined as follows:

$$\phi = \frac{\left(\frac{Fuel}{Oxidant}\right)}{\left(\frac{Fuel}{Oxidant}\right)_{stoichiometric}}, \#(S4)$$

where (*Fuel*) and (*Oxidant*) denote the molar ratio of fuel and oxidant in the mixture, respectively. Equivalence ratio greater than 1.0 implies fuel-rich mixture gas, and equivalence ratio less than 1.0 represents oxygen-rich mixture gas. For combustion system driven by air blowers, the equivalence ratio is estimated by measuring the oxygen concentration in the flue gas. The chemical equation of pure hydrogen combustion is as follows:

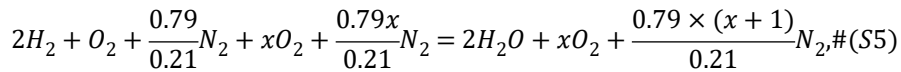

where  $x$  is the stoichiometric coefficient of the excessive combustion air. Thus, the  $O_2$  concentration in the flue gas can be obtained with the following equations:

$$[O_2] = \frac{x}{x + \frac{0.79 + 0.79x}{0.21}} = \frac{0.21x}{0.79 + x}, \#(S6)$$

where  $[O_2]$  is the volumetric concentration of  $O_2$  in the flue gas. Note that the measured  $[O_2]$  in the present study with the Testo-340 gas analyzer has removed the impact of water vapor in the flue gas. As a result, the equivalence ratio ( $\phi$ ) of swirl combustion is as follows:

$$\phi = \frac{1}{1 + x} = \frac{1 - 4.762[O_2]}{1 - [O_2]}, \#(S7)$$

Hydrogen combustion provides substantial thermal energy for power generation. The combustion efficiency is defined as follows:

$$\eta_{comb} = \frac{(Fuel)_{in} - (Fuel)_{unburnt}}{(Fuel)_{in}}, \#(S8)$$

where  $(Fuel)_{in}$  and  $(Fuel)_{unburnt}$  denote the fuel flow rate into the combustor and the unburnt fuel flow rate in the flue gas. Results showed that the hydrogen concentration in the flue gas is less than 50 ppm, which is also confirmed by a hydrogen gas alarm with an alarm threshold of 50 ppm. Thus, the combustion efficiency is almost complete.

For the entire hydrogen-fueled TEG, the overall efficiency ( $\eta_{sys}$ ) and the net efficiency ( $\eta_{net}$ ) are defined as follows:

$$\eta_{sys} = \frac{P_{tot}}{P_{in}}, \#(S9)$$

$$\eta_{net} = \frac{P_{net}}{P_{in}} = \frac{P_{tot} - P_b - P_p - P_f}{m_f \times LHV_{H_2}}, \#(S10)$$

where  $P_{tot}$  is the total electric power generated by the CP-TEG.  $P_{net}$  and  $P_{in}$  are the net electric power and input power of the CP-TEG, respectively.  $LHV_{H_2}$  is the lower heat value ( $LHV$ ) of the pure hydrogen.  $P_b$ ,  $P_p$ , and  $P_f$  are the power consumptions of the air blower, water pumps, and cooling fans, sequentially. The heating power ( $P_{heat}$ ) from the trigeneration system is defined as follows:

$$P_{heat} = c_p \rho_{air} U_{air-1} A_{rad} (T_{air-1} - T_{atm}), \#(S11)$$

where  $c_p$ ,  $\rho_{air}$ , and  $A_{rad}$  are the air thermal capacity, air density, and the air outlet area (0.0432 m<sup>2</sup>) of the radiator. As demonstrated previously, the hydrogen-fueled CP-TEG is an inherent CHP solution. The CHP efficiency is defined as follows:

$$\eta_{CHP} = \frac{P_{tot} + P_{heat}}{P_{in}} = \frac{P_{tot} + P_{heat}}{m_f \times LHV_{H_2}}, \#(S12)$$

## Supplementary Fig. 1.

Figure Configuration of the hydrogen-fueled CP-TEG. (a) Micro-swirl combustor, combustion chamber, and two TEG units. (b) Four-channel heat-collector (HC) assembly. (c) Nine-channel HC assembly.

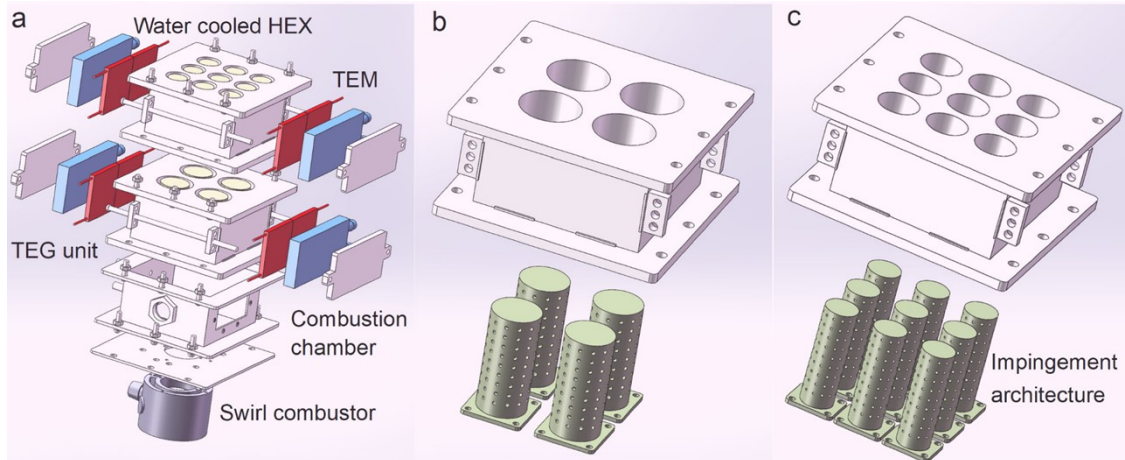

**Supplementary Fig. 2.**

The HC assembly combines aluminum collectors (Al 6063-T6) with perforated radial stainless-steel nozzles to achieve directed jet-impingement heat transfer.

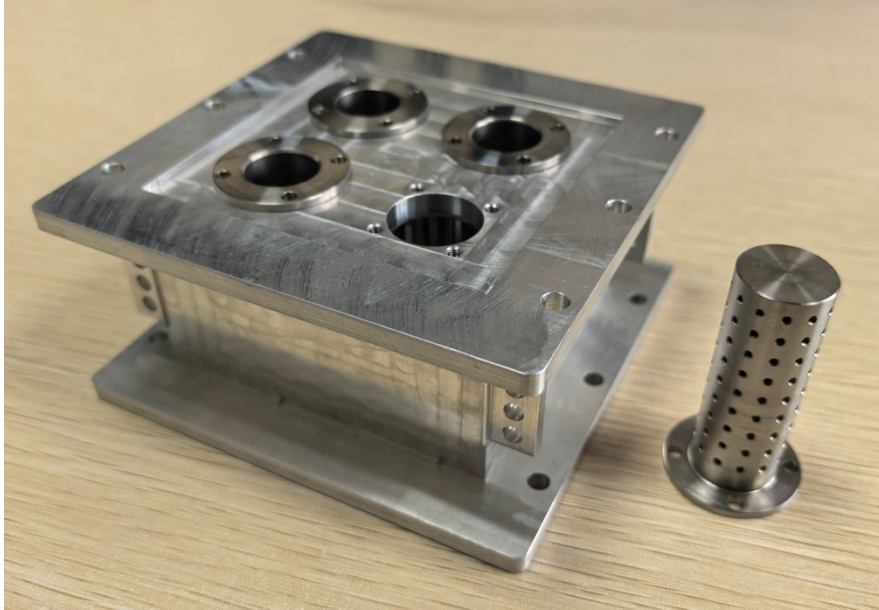

### Supplementary Fig. 3.

Experimental setup of the HPTT system. Here MFC is abbreviated from mass flow controller, TEG is abbreviated from thermoelectric generator, HEX is abbreviated from heat exchanger,  $P_{tot}$  is the generated total electric power,  $m_f$  is the hydrogen mass flow rate,  $T_{f-1}$  is the flue gas temperature at  $x = 20$  mm,  $T_{f-2}$  is the flue gas temperature at  $x = 60$  mm,  $T_{h-1}$  and  $T_{c-1}$  are the hot-side and cold-side temperatures at  $x = 60$  mm,  $T_{h-2}$  and  $T_{c-2}$  are the hot-side and cold-side temperatures at  $x = 80$  mm,  $T_{h-3}$  and  $T_{c-3}$  are the hot-side and cold-side temperatures at  $x = 110$  mm,  $T_{h-4}$  and  $T_{c-4}$  are the hot-side and cold-side temperatures at  $x = 130$  mm,  $T_{f-3}$  and  $T_{f-4}$  are the flue gas temperatures before and after the HEX,  $m_w$  is water mass,  $T_{atm}$  is the atmospheric temperature,  $T_{air-1}$  is the air temperature leaving the Radiator-1,  $U_{air-1}$  is the air velocity leaving the Radiator-1,  $T_w$  is the water temperature entering the water pumps.

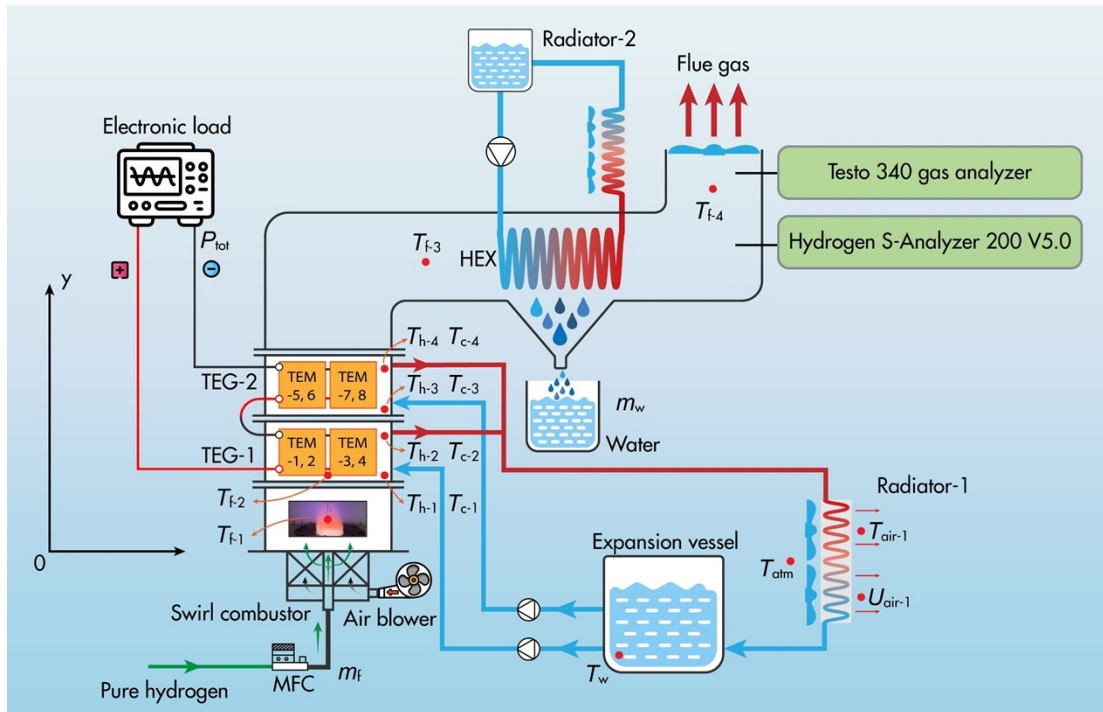

### Supplementary Table 1.

Experimental cases. Here  $P_{in}$  is the input power,  $\phi$  is the equivalence ratio, CI is abbreviated from cooling intensity,  $R_{ld}$  is the loaded electrical resistance.

| No. | $P_{in}$ (kW) | Fuel           | $\phi$ | Cooling mode | CI††  | Insulation | $R_{ld}$ † ( $\Omega$ ) |
|-----|---------------|----------------|--------|--------------|-------|------------|-------------------------|
| 1   | 1.00          | H <sub>2</sub> | 0.45   | Water-CLC    | CI-1  | NO         | 3~24                    |
| 2   | 1.25          | H <sub>2</sub> | 0.45   | Water-CLC    | CI -1 | NO         | 3~24                    |
| 3   | 1.50          | H <sub>2</sub> | 0.45   | Water-CLC    | CI -1 | NO         | 3~24                    |
| 4   | 1.50          | H <sub>2</sub> | 0.41   | Water-CLC    | CI-1  | NO         | 3~24                    |
| 5   | 1.50          | H <sub>2</sub> | 0.43   | Water-CLC    | CI-1  | NO         | 3~24                    |
| 6   | 1.50          | H <sub>2</sub> | 0.48   | Water-CLC    | CI-1  | NO         | 3~24                    |
| 7   | 1.80          | H <sub>2</sub> | 0.43   | Water-CLC    | CI-1  | NO         | 3~24                    |
| 8   | 2.00          | H <sub>2</sub> | 0.43   | Water-OLC    | /     | NO         | 3~24                    |
| 9   | 1.80          | H <sub>2</sub> | 0.43   | Water-CLC    | CI-2  | NO         | 3~24                    |
| 10  | 1.80          | H <sub>2</sub> | 0.43   | Water-CLC    | CI-3  | NO         | 3~24                    |
| 11  | 1.70          | H <sub>2</sub> | 0.43   | Water-CLC    | CI-1  | YES        | 3~24                    |

† $R_{ld}$ : 3, 4, 5, ... 12, 14, 16, 18, 20, 22, 24 (a total of 16 cases for each series of measurements for power load feature test). ††Cooling Intensity (CI): CI-1:  $P_f = P_p = 12.0$  V, CI-2:  $P_f = P_p = 11.0$  V, CI-3:  $P_f = P_p = 10.0$  V.

## Supplementary Table 2.

Standard errors of the measured parameters.

| Parameter                       | Error       | Parameter                  | Error                   |
|---------------------------------|-------------|----------------------------|-------------------------|
| $P$ (Electric power)            | $\pm 0.2\%$ | $m_f$ (hydrogen flow rate) | $\pm 0.1\% \text{F.S.}$ |
| $T$ (type-K thermocouple)       | $\pm 0.5\%$ | $T$ (type-S thermocouple)  | $\pm 0.25\%$            |
| $U_{\text{air}}$ (air velocity) | $\pm 2.0\%$ | $\eta_{\text{sys}}$        | $\pm 0.3\%$             |
| $\text{O}_2$                    | $\pm 0.2\%$ | NO                         | $\pm 2 \text{ ppm}$     |
| $\phi$ (equivalence ratio)      | $\pm 0.4\%$ | $P_{\text{heat}}$          | $\pm 3.83\%$            |

### Supplementary Table 3.

Costs for the components of the developed HPTT system.

| Component               | Quantity | Cost (\$)* | Component         | Quantity | Cost (\$)* |
|-------------------------|----------|------------|-------------------|----------|------------|
| Heat collector          | 2        | 34.0       | Expansion vessel  | 1        | 8.0        |
| Combustion chamber      | 1        | 8.6        | Blower            | 1        | 5.8        |
| TEM (40×40 mm)          | 8        | 56.4       | Swirl combustor   | 1        | 24.8       |
| HEX (40×80 mm)          | 4        | 28.0       | Radiator          | 3        | 47.8       |
| Cooling fan             | 6        | 40.8       | Liquid pump       | 3        | 36.0       |
| Ignitor system          | 1        | 17.8       | Other accessories | \        | 60.0**     |
| Water collection system | 1        | 52.0       | Total             | -        | 420.0      |

\*The exchange rate is 1 \$ = 7.3 ¥. The material prices of aluminum 6061-T6 and stainless steel 304 are taken as 3.9 and 2.1 \$ per kilogram, respectively. \*\*Estimated cost.

## Original Data

Data of Fig.1 d:

| Reference No.         | $P_{\text{tot}}$ (W) | $\eta_{\text{sys}}$ (%) |
|-----------------------|----------------------|-------------------------|
| Schaevitz et al. [35] | 0.075                | 0.02                    |
| Vican, et al. [36]    | 0.57                 | 0.052                   |
| Federici, et al. [37] | 1                    | 0.85                    |
| Yoshida, et al. [38]  | 0.185                | 2.8                     |
| Abedi, et al. [39]    | 5.92                 | 2.27                    |
| Li, et al. [40]       | 14.6                 | 1.74                    |
| This work             | 61.8                 | 3.1                     |

Data of Fig.1 e:

| Reference No.              | UPC ( $\text{kg}\cdot\text{kWh}^{-1}$ ) | WHR ( $\text{kg}\cdot\text{h}^{-1}$ ) |
|----------------------------|-----------------------------------------|---------------------------------------|
| Anbarasu and Pavithra [46] | 0.694                                   | 0.763                                 |
| Bagheri [52]               | 0.98                                    | 0.66                                  |
| Ahmad, et al. [53]         | 0.44                                    | 0.36                                  |
| Pontious, et al. [47]      | 0.23                                    | 0.005                                 |
| Liu, et al. [48]           | 0.43                                    | 0.025                                 |
| Casallas, et al. [49]      | 0.142                                   | 0.005                                 |
| Pokorny, et al. [45]       | 1                                       | 1.45                                  |
| Kwan, et al. [43]          | 5                                       | 3                                     |

|           |      |       |
|-----------|------|-------|
| This work | 37.6 | 0.258 |
|-----------|------|-------|

---

Data of Fig.1 f:

| Reference No.           | $\eta_{\text{CHP}}$ (%) |
|-------------------------|-------------------------|
| Obernberger et al. [54] | 90.6                    |
| Li et al. [30]          | 92.5                    |
| Tian et al. [55]        | 61                      |
| Abass [56]              | 85                      |
| Gao et al. [5]          | 93                      |
| This work               | 94.6                    |

---

Data of Fig.2 c:

| $R_{ld} (\Omega)$ | $P_{tot} (W)$ Insulated | $P_{tot} (W)$ Uninsulated |
|-------------------|-------------------------|---------------------------|
| 24                | 39.37                   | 40.25                     |
| 22                | 40.88                   | 42.18                     |
| 20                | 42.65                   | 43.98                     |
| 18                | 44.21                   | 45.72                     |
| 16                | 45.64                   | 47.37                     |
| 14                | 46.89                   | 48.73                     |
| 12                | 48                      | 49.76                     |
| 11                | 48.17                   | 49.99                     |
| 10                | 47.92                   | 49.9                      |
| 9                 | 47.33                   | 49.6                      |
| 8                 | 46.4                    | 48.79                     |
| 7                 | 45.36                   | 47.92                     |
| 6                 | 43.96                   | 46.42                     |
| 5                 | 41.55                   | 43.97                     |
| 4                 | 37.76                   | 40.38                     |
| 3                 | 32.36                   | 35.2                      |

Data of Fig.2 f:

| $t$ (h) | $m_{\text{water}}$ (g) |
|---------|------------------------|
| 0.01667 | 2.92                   |
| 0.08333 | 18.27                  |
| 0.16667 | 39.21                  |
| 0.25    | 61.86                  |
| 0.33333 | 90.76                  |
| 0.41667 | 107.18                 |
| 0.5     | 127.17                 |
| 0.58333 | 149.38                 |
| 0.66667 | 171.22                 |
| 0.75    | 194.95                 |
| 0.83333 | 215.68                 |
| 0.91667 | 236                    |
| 1       | 258.23                 |
| 1.08333 | 280.09                 |
| 1.16667 | 301.67                 |

Data of Fig.3 b:

| $R_{ld} (\Omega)$ | $P_{tot} (W)$ at $\phi=0.41$ | $P_{tot} (W)$ at $\phi=0.43$ | $P_{tot} (W)$ at $\phi=0.45$ | $P_{tot} (W)$ at $\phi=0.48$ |
|-------------------|------------------------------|------------------------------|------------------------------|------------------------------|
| 24                | 21.39                        | 27.32                        | 24.27                        | 23.29                        |
| 22                | 22.53                        | 28.64                        | 25.37                        | 24.34                        |
| 20                | 23.62                        | 29.8                         | 26.41                        | 25.39                        |
| 18                | 24.66                        | 30.94                        | 27.47                        | 26.43                        |
| 16                | 25.75                        | 31.99                        | 28.5                         | 27.47                        |
| 14                | 26.71                        | 32.94                        | 29.48                        | 28.4                         |
| 12                | 27.48                        | 33.68                        | 30.26                        | 29.18                        |
| 11                | 27.78                        | 33.85                        | 30.53                        | 29.4                         |
| 10                | 27.95                        | 33.9                         | 30.63                        | 29.46                        |
| 9                 | 27.97                        | 33.78                        | 30.61                        | 29.43                        |
| 8                 | 27.84                        | 33.12                        | 30.42                        | 29.2                         |
| 7                 | 27.41                        | 32.45                        | 29.94                        | 28.66                        |
| 6                 | 26.61                        | 31.34                        | 29.14                        | 27.92                        |
| 5                 | 25.36                        | 29.73                        | 27.79                        | 26.54                        |
| 4                 | 23.43                        | 27.17                        | 25.67                        | 24.48                        |
| 3                 | 20.52                        | 23.64                        | 22.44                        | 21.4                         |

Data of Fig.3 c:

| $R_{ld}$ ( $\Omega$ ) | $\eta_{sys}$ (%) at $\phi=0.41$ | $\eta_{sys}$ (%) at $\phi=0.43$ | $\eta_{sys}$ (%) at $\phi=0.45$ | $\eta_{sys}$ (%) at $\phi=0.48$ |
|-----------------------|---------------------------------|---------------------------------|---------------------------------|---------------------------------|
| 24                    | 1.426                           | 1.82133                         | 1.618                           | 1.55267                         |
| 22                    | 1.502                           | 1.90933                         | 1.69133                         | 1.62267                         |
| 20                    | 1.57467                         | 1.98667                         | 1.76067                         | 1.69267                         |
| 18                    | 1.644                           | 2.06267                         | 1.83133                         | 1.762                           |
| 16                    | 1.71667                         | 2.13267                         | 1.9                             | 1.83133                         |
| 14                    | 1.78067                         | 2.196                           | 1.96533                         | 1.89333                         |
| 12                    | 1.832                           | 2.24533                         | 2.01733                         | 1.94533                         |
| 11                    | 1.852                           | 2.25667                         | 2.03533                         | 1.96                            |
| 10                    | 1.86333                         | 2.26                            | 2.042                           | 1.964                           |
| 9                     | 1.86467                         | 2.252                           | 2.04067                         | 1.962                           |
| 8                     | 1.856                           | 2.208                           | 2.028                           | 1.94667                         |
| 7                     | 1.82733                         | 2.16333                         | 1.996                           | 1.91067                         |
| 6                     | 1.774                           | 2.08933                         | 1.94267                         | 1.86133                         |
| 5                     | 1.69067                         | 1.982                           | 1.85267                         | 1.76933                         |
| 4                     | 1.562                           | 1.81133                         | 1.71133                         | 1.632                           |
| 3                     | 1.368                           | 1.576                           | 1.496                           | 1.42667                         |

Data of Fig.3 f:

| $y$ (mm) | 1.8 kW CLC |           | 2.0 kW OLC |           |
|----------|------------|-----------|------------|-----------|
|          | $T_h$ (K)  | $T_c$ (K) | $T_h$ (K)  | $T_c$ (K) |
| 60       | 525.1      | 325.4     | 528.8      | 304.5     |
| 80       | 522.4      | 328.2     | 525.7      | 304.8     |
| 110      | 488.1      | 325.4     | 489        | 304.5     |
| 130      | 486.5      | 327.3     | 487        | 304.6     |

Data of Fig.3 g:

| $R_{ld}$ ( $\Omega$ ) | $P_{tot}$ (W) at 1.8 kW | $P_{tot}$ (W) at 2.0 kW |
|-----------------------|-------------------------|-------------------------|
| 24                    | 40.25                   | 47.14                   |
| 22                    | 42.18                   | 49.74                   |
| 20                    | 43.98                   | 52.19                   |
| 18                    | 45.72                   | 54.66                   |
| 16                    | 47.37                   | 56.92                   |
| 14                    | 48.73                   | 59.02                   |
| 12                    | 49.76                   | 60.82                   |
| 11                    | 49.99                   | 61.45                   |
| 10                    | 49.9                    | 61.79                   |
| 9                     | 49.6                    | 61.92                   |
| 8                     | 48.79                   | 61.57                   |
| 7                     | 47.92                   | 60.61                   |
| 6                     | 46.42                   | 58.93                   |
| 5                     | 43.97                   | 56.1                    |
| 4                     | 40.38                   | 51.58                   |
| 3                     | 35.2                    | 44.91                   |

Data of Fig.3 h:

| $R_{ld} (\Omega)$ | $P_{tot} (W)$ at CI-3 | $P_{tot} (W)$ at CI-2 | $P_{tot} (W)$ at CI-1 |
|-------------------|-----------------------|-----------------------|-----------------------|
| 24                | 38.8                  | 39.02                 | 40.25                 |
| 22                | 40.57                 | 40.88                 | 42.18                 |
| 20                | 42.33                 | 43.05                 | 43.98                 |
| 18                | 44.22                 | 44.75                 | 45.72                 |
| 16                | 45.85                 | 46.32                 | 47.37                 |
| 14                | 47.31                 | 47.84                 | 48.73                 |
| 12                | 48.42                 | 49.04                 | 49.76                 |
| 11                | 48.67                 | 49.41                 | 49.99                 |
| 10                | 48.6                  | 49.21                 | 49.9                  |
| 9                 | 48.2                  | 48.97                 | 49.6                  |
| 8                 | 47.17                 | 48.14                 | 48.79                 |
| 7                 | 46.16                 | 46.88                 | 47.92                 |
| 6                 | 44.3                  | 45.04                 | 46.42                 |
| 5                 | 42.38                 | 42.87                 | 43.97                 |
| 4                 | 38.93                 | 39.11                 | 40.38                 |
| 3                 | 33.9                  | 34.11                 | 35.2                  |

Data of Fig.3 j:

| $R_{ld}$ ( $\Omega$ ) | $\eta_{sys}$ (%) at 1.7 kW CLC insulated | $\eta_{sys}$ (%) at 1.8 Kw CLC uninsulated |
|-----------------------|------------------------------------------|--------------------------------------------|
| 24                    | 2.31588                                  | 2.23611                                    |
| 22                    | 2.40471                                  | 2.34333                                    |
| 20                    | 2.50882                                  | 2.44333                                    |
| 18                    | 2.60059                                  | 2.54                                       |
| 16                    | 2.68471                                  | 2.63167                                    |
| 14                    | 2.75824                                  | 2.70722                                    |
| 12                    | 2.82353                                  | 2.76444                                    |
| 11                    | 2.83353                                  | 2.77722                                    |
| 10                    | 2.81882                                  | 2.77222                                    |
| 9                     | 2.78412                                  | 2.75556                                    |
| 8                     | 2.72941                                  | 2.71056                                    |
| 7                     | 2.66824                                  | 2.66222                                    |
| 6                     | 2.58588                                  | 2.57889                                    |
| 5                     | 2.44412                                  | 2.44278                                    |
| 4                     | 2.22118                                  | 2.24333                                    |
| 3                     | 1.90353                                  | 1.95556                                    |

Data of Fig.3 k:

| $R_{ld} (\Omega)$ | $P_{tot} (W)$ at 1.7 kW CLC insulated | $P_{tot} (W)$ at 1.8 Kw CLC uninsulated |
|-------------------|---------------------------------------|-----------------------------------------|
| 24                | 39.37                                 | 40.25                                   |
| 22                | 40.88                                 | 42.18                                   |
| 20                | 42.65                                 | 43.98                                   |
| 18                | 44.21                                 | 45.72                                   |
| 16                | 45.64                                 | 47.37                                   |
| 14                | 46.89                                 | 48.73                                   |
| 12                | 48                                    | 49.76                                   |
| 11                | 48.17                                 | 49.99                                   |
| 10                | 47.92                                 | 49.9                                    |
| 9                 | 47.33                                 | 49.6                                    |
| 8                 | 46.4                                  | 48.79                                   |
| 7                 | 45.36                                 | 47.92                                   |
| 6                 | 43.96                                 | 46.42                                   |
| 5                 | 41.55                                 | 43.97                                   |
| 4                 | 37.76                                 | 40.38                                   |
| 3                 | 32.36                                 | 35.2                                    |

Data of Fig.4 d:

Hydrogen:

| $t$ (h) | $m_{\text{water}}$ (g) |
|---------|------------------------|
| 0.01667 | 2.92                   |
| 0.08333 | 18.27                  |
| 0.16667 | 39.21                  |
| 0.25    | 61.86                  |
| 0.33333 | 90.76                  |
| 0.41667 | 107.18                 |
| 0.5     | 127.17                 |
| 0.58333 | 149.38                 |
| 0.66667 | 171.22                 |
| 0.75    | 194.95                 |
| 0.83333 | 215.68                 |
| 0.91667 | 236                    |
| 1       | 258.23                 |

|         |          |
|---------|----------|
| 1.08333 | 280.09   |
| 1.16667 | 301.67   |
| 1.25    | 317.8656 |
| 1.33333 | 352.655  |
| 1.41667 | 357.1991 |
| 1.5     | 399.7076 |
| 1.58333 | 406.8353 |
| 1.66667 | 434.4008 |
| 1.75    | 443.9622 |
| 1.83333 | 490.8797 |
| 1.91667 | 489.9076 |
| 2       | 527.9019 |
| 2.08333 | 538.624  |
| 2.16667 | 567.5591 |
| 2.25    | 567.2641 |
| 2.33333 | 621.6694 |
| 2.41667 | 620.0936 |

|         |          |
|---------|----------|
| 2.5     | 657.776  |
| 2.58333 | 653.597  |
| 2.66667 | 713.5362 |
| 2.75    | 700.8883 |
| 2.83333 | 750.8961 |
| 2.91667 | 752.5769 |
| 3       | 785.0487 |
| 3.08333 | 782.8712 |
| 3.16667 | 846.8779 |
| 3.25    | 831.2046 |
| 3.33333 | 879.426  |
| 3.41667 | 887.251  |
| 3.5     | 920.7668 |
| 0.01667 | 2.86744  |
| 0.08333 | 18.48924 |
| 0.16667 | 38.85711 |
| 0.25    | 63.4065  |

|         |          |
|---------|----------|
| 0.33333 | 88.40024 |
| 0.41667 | 107.5015 |
| 0.5     | 125.644  |
| 0.58333 | 152.2182 |
| 0.66667 | 170.7063 |
| 0.75    | 196.5096 |
| 0.83333 | 211.1507 |
| 0.91667 | 242.844  |
| 1       | 253.8401 |
| 1.08333 | 284.0113 |
| 1.16667 | 300.4633 |
| 1.25    | 324.8587 |
| 1.33333 | 342.428  |
| 1.41667 | 359.3423 |
| 1.5     | 393.712  |
| 1.58333 | 413.7515 |
| 1.66667 | 431.36   |

|         |          |
|---------|----------|
| 1.75    | 448.8458 |
| 1.83333 | 479.5894 |
| 1.91667 | 503.1351 |
| 2       | 517.8718 |
| 2.08333 | 543.4716 |
| 2.16667 | 564.7213 |
| 2.25    | 580.8785 |
| 2.33333 | 604.2627 |
| 2.41667 | 638.6964 |
| 2.5     | 648.5671 |
| 2.58333 | 663.4009 |
| 2.66667 | 712.1091 |
| 2.75    | 707.8972 |
| 2.83333 | 732.1237 |
| 2.91667 | 773.6491 |
| 3       | 772.488  |
| 3.08333 | 795.3971 |

|         |          |
|---------|----------|
| 3.16667 | 840.1029 |
| 3.25    | 842.0102 |
| 3.33333 | 860.0787 |
| 3.41667 | 914.7557 |
| 3.5     | 908.7968 |
| 0.01667 | 2.86744  |
| 0.08333 | 18.48924 |
| 0.16667 | 38.85711 |
| 0.25    | 63.4065  |
| 0.33333 | 88.40024 |
| 0.41667 | 107.5015 |
| 0.5     | 125.644  |
| 0.58333 | 152.2182 |
| 0.66667 | 170.7063 |
| 0.75    | 196.5096 |
| 0.83333 | 211.1507 |
| 0.91667 | 242.844  |

|         |          |
|---------|----------|
| 1       | 253.8401 |
| 1.08333 | 284.0113 |
| 1.16667 | 300.4633 |
| 1.25    | 324.8587 |
| 1.33333 | 342.428  |
| 1.41667 | 359.3423 |
| 1.5     | 393.712  |
| 1.58333 | 413.7515 |
| 1.66667 | 431.36   |
| 1.75    | 448.8458 |
| 1.83333 | 479.5894 |
| 1.91667 | 503.1351 |
| 2       | 517.8718 |
| 2.08333 | 543.4716 |
| 2.16667 | 564.7213 |
| 2.25    | 580.8785 |
| 2.33333 | 604.2627 |

|         |          |
|---------|----------|
| 2.41667 | 638.6964 |
| 2.5     | 648.5671 |
| 2.58333 | 663.4009 |
| 2.66667 | 712.1091 |
| 2.75    | 707.8972 |
| 2.83333 | 732.1237 |
| 2.91667 | 773.6491 |
| 3       | 772.488  |
| 3.08333 | 795.3971 |
| 3.16667 | 840.1029 |
| 3.25    | 842.0102 |
| 3.33333 | 860.0787 |
| 3.41667 | 914.7557 |
| 3.5     | 908.7968 |
| 0.01667 | 2.89664  |
| 0.08333 | 19.14696 |
| 0.16667 | 39.68052 |

|         |          |
|---------|----------|
| 0.25    | 63.59208 |
| 0.33333 | 90.39696 |
| 0.41667 | 112.7534 |
| 0.5     | 129.7134 |
| 0.58333 | 154.7577 |
| 0.66667 | 171.9049 |
| 0.75    | 203.5278 |
| 0.83333 | 213.0918 |
| 0.91667 | 249.216  |
| 1       | 262.3617 |
| 1.08333 | 286.8122 |
| 1.16667 | 301.67   |
| 1.25    | 330.5803 |
| 1.33333 | 355.4763 |
| 1.41667 | 368.6295 |
| 1.5     | 393.3123 |
| 1.58333 | 427.1771 |

|         |          |
|---------|----------|
| 1.66667 | 440.4824 |
| 1.75    | 455.5052 |
| 1.83333 | 489.8979 |
| 1.91667 | 510.4837 |
| 2       | 531.0693 |
| 2.08333 | 556.9372 |
| 2.16667 | 561.8835 |
| 2.25    | 597.8964 |
| 2.33333 | 632.8595 |
| 2.41667 | 633.7357 |
| 2.5     | 653.8293 |
| 2.58333 | 683.6624 |
| 2.66667 | 720.6716 |
| 2.75    | 721.915  |
| 2.83333 | 752.3978 |
| 2.91667 | 781.1749 |
| 3       | 774.0581 |

|         |          |
|---------|----------|
| 3.08333 | 828.2777 |
| 3.16667 | 859.5811 |
| 3.25    | 851.9847 |
| 3.33333 | 878.5466 |
| 3.41667 | 923.6283 |
| 3.5     | 927.2122 |
| 0.01667 | 2.79152  |
| 0.08333 | 18.61713 |
| 0.16667 | 38.34738 |
| 0.25    | 58.4577  |
| 0.33333 | 91.84912 |
| 0.41667 | 106.2154 |
| 0.5     | 122.9734 |
| 0.58333 | 150.1269 |
| 0.66667 | 168.3093 |
| 0.75    | 185.5924 |
| 0.83333 | 219.3466 |

|         |          |
|---------|----------|
| 0.91667 | 229.864  |
| 1       | 255.1312 |
| 1.08333 | 280.3701 |
| 1.16667 | 289.3015 |
| 1.25    | 320.7264 |
| 1.33333 | 340.3121 |
| 1.41667 | 355.7703 |
| 1.5     | 405.3035 |
| 1.58333 | 395.0371 |
| 1.66667 | 426.5816 |
| 1.75    | 446.626  |
| 1.83333 | 477.6259 |
| 1.91667 | 486.9681 |
| 2       | 537.4042 |
| 2.08333 | 521.388  |
| 2.16667 | 560.1808 |
| 2.25    | 568.9659 |

|         |          |
|---------|----------|
| 2.33333 | 594.9376 |
| 2.41667 | 626.9146 |
| 2.5     | 641.3316 |
| 2.58333 | 643.793  |
| 2.66667 | 718.531  |
| 2.75    | 674.9554 |
| 2.83333 | 750.1452 |
| 2.91667 | 763.8656 |
| 3       | 760.7122 |
| 3.08333 | 767.9966 |
| 3.16667 | 850.2654 |
| 3.25    | 793.8004 |
| 3.33333 | 870.6318 |
| 3.41667 | 898.7852 |
| 3.5     | 884.8569 |

Propane:

| $t$ (h) | $m_{\text{water}}$ (g) |
|---------|------------------------|
| 0.16667 | 15                     |
| 0.33333 | 31                     |
| 0.5     | 47                     |
| 0.66667 | 63                     |
| 0.83333 | 79                     |
| 1       | 95                     |
| 1.16667 | 112                    |
| 1.33333 | 128                    |
| 1.5     | 144                    |
| 1.66667 | 159                    |
| 1.83333 | 175                    |
| 2       | 190                    |
| 2.16667 | 206                    |
| 2.33333 | 222                    |
| 2.5     | 237                    |

|         |     |
|---------|-----|
| 2.66667 | 252 |
| 2.83333 | 268 |
| 3       | 283 |
| 3.16667 | 298 |
| 3.33333 | 314 |
| 3.5     | 330 |

Data of Fig.4 e:

| $t$ (h) | WHR<br>(g·h <sup>-1</sup> ) | $t$ (h) | WHR<br>(g·h <sup>-1</sup> ) | $t$ (h) | WHR<br>(g·h <sup>-1</sup> ) |
|---------|-----------------------------|---------|-----------------------------|---------|-----------------------------|
| 0.25    | 247.44                      | 0.25    | 249.61                      | 0.25    | 253.69899                   |
| 0.33333 | 272.28                      | 0.33333 | 275.42565                   | 0.33333 | 274.59329                   |
| 0.41667 | 257.232                     | 0.41667 | 259.12754                   | 0.41667 | 253.58291                   |
| 0.5     | 254.34                      | 0.5     | 260.0507                    | 0.5     | 240.34647                   |
| 0.58333 | 256.08                      | 0.58333 | 247.3953                    | 0.58333 | 254.36964                   |
| 0.66667 | 256.83                      | 0.66667 | 254.14227                   | 0.66667 | 265.89173                   |
| 0.75    | 259.93333                   | 0.75    | 250.07822                   | 0.75    | 258.06129                   |
| 0.83333 | 258.816                     | 0.83333 | 252.42454                   | 0.83333 | 261.81102                   |
| 0.91667 | 257.45455                   | 0.91667 | 256.26382                   | 0.91667 | 261.11066                   |
| 1       | 258.23                      | 1       | 248.38059                   | 1       | 261.28047                   |
| 1.08333 | 258.54462                   | 1.08333 | 251.80151                   | 1.08333 | 245.48579                   |
| 1.16667 | 258.57429                   | 1.16667 | 259.99438                   | 1.16667 | 255.3403                    |
| 1.25    | 254.29251                   | 1.25    | 253.82106                   | 1.25    | 254.81203                   |

|         |           |         |           |         |           |
|---------|-----------|---------|-----------|---------|-----------|
| 1.33333 | 264.49128 | 1.33333 | 257.99299 | 1.33333 | 252.75844 |
| 1.41667 | 252.14054 | 1.41667 | 252.45546 | 1.41667 | 243.89706 |
| 1.5     | 266.47172 | 1.5     | 270.91114 | 1.5     | 259.5216  |
| 1.58333 | 256.94863 | 1.58333 | 246.7876  | 1.58333 | 243.0603  |
| 1.66667 | 260.64048 | 1.66667 | 264.91681 | 1.66667 | 257.13695 |
| 1.75    | 253.6927  | 1.75    | 255.94295 | 1.75    | 260.50511 |
| 1.83333 | 267.75255 | 1.83333 | 263.41978 | 1.83333 | 272.09496 |
| 1.91667 | 255.60395 | 1.91667 | 248.16179 | 1.91667 | 261.51837 |
| 2       | 263.95096 | 2       | 271.07896 | 2       | 258.87888 |
| 2.08333 | 258.5395  | 2.08333 | 254.28962 | 2.08333 | 246.1751  |
| 2.16667 | 261.95034 | 2.16667 | 253.17291 | 2.16667 | 261.83272 |
| 2.25    | 252.11739 | 2.25    | 243.73953 | 2.25    | 253.2146  |
| 2.33333 | 266.42975 | 2.33333 | 271.5785  | 2.33333 | 261.87593 |
| 2.41667 | 256.59045 | 2.41667 | 257.17061 | 2.41667 | 259.03627 |
| 2.5     | 263.11038 | 2.5     | 267.45144 | 2.5     | 273.55481 |
| 2.58333 | 253.00527 | 2.58333 | 255.80882 | 2.58333 | 259.23376 |
| 2.66667 | 267.57608 | 2.66667 | 266.91677 | 2.66667 | 276.00874 |

|         |           |         |           |         |           |
|---------|-----------|---------|-----------|---------|-----------|
| 2.75    | 254.86847 | 2.75    | 262.03486 | 2.75    | 256.41986 |
| 2.83333 | 265.02214 | 2.83333 | 261.44354 | 2.83333 | 257.90073 |
| 2.91667 | 258.02637 | 2.91667 | 257.67623 | 2.91667 | 266.91796 |
| 3       | 261.68291 | 3       | 266.40838 | 3       | 265.63302 |
| 3.08333 | 253.90416 | 3.08333 | 254.74103 | 3.08333 | 255.23716 |
| 3.16667 | 267.43513 | 3.16667 | 272.86914 | 3.16667 | 261.88719 |
| 3.25    | 255.75525 | 3.25    | 255.86139 | 3.25    | 264.39876 |
| 3.33333 | 263.82781 | 3.33333 | 266.28669 | 3.33333 | 262.56144 |
| 3.41667 | 259.68321 | 3.41667 | 250.12894 | 3.41667 | 262.25901 |
| 3.5     | 263.07622 | 3.5     | 256.75003 | 3.5     | 258.78782 |
| 3.58333 | 263.53441 | 3.58333 | 258.33145 | 3.58333 | 261.93502 |
| 3.66667 | 266.44315 | 3.66667 | 257.27351 | 3.66667 | 276.09265 |
| 3.75    | 263.91096 | 3.75    | 257.65495 | 3.75    | 266.43052 |
| 3.83333 | 257.0778  | 3.83333 | 248.61223 | 3.83333 | 263.91119 |
| 3.91667 | 258.19019 | 3.91667 | 252.88645 | 3.91667 | 249.17316 |
| 4       | 259.70137 | 4       | 260.8695  | 4       | 254.77431 |
| 4.08333 | 258.89037 | 4.08333 | 255.1463  | 4.08333 | 246.14649 |

|         |           |         |           |         |           |
|---------|-----------|---------|-----------|---------|-----------|
| 4.16667 | 257.71069 | 4.16667 | 254.08032 | 4.16667 | 242.56581 |
| 4.25    | 254.76582 | 4.25    | 248.31133 | 4.25    | 240.6416  |
| 4.33333 | 267.34778 | 4.33333 | 261.65006 | 4.33333 | 261.51291 |
| 4.41667 | 256.29953 | 4.41667 | 262.85208 | 4.41667 | 261.92479 |
| 4.5     | 254.82409 | 4.5     | 256.19046 | 4.5     | 240.74047 |
| 4.58333 | 267.06611 | 4.58333 | 267.7709  | 4.58333 | 277.36765 |
| 4.66667 | 256.56083 | 4.66667 | 249.372   | 4.66667 | 246.58626 |
| 4.75    | 265.61628 | 4.75    | 268.54842 | 4.75    | 257.37952 |
| 4.83333 | 264.15909 | 4.83333 | 256.61418 | 4.83333 | 261.58961 |
| 4.91667 | 266.24281 | 4.91667 | 262.66504 | 4.91667 | 255.49006 |
| 5       | 266.16088 | 5       | 273.95061 | 5       | 261.69709 |
| 5.08333 | 261.19425 | 5.08333 | 262.44798 | 5.08333 | 270.3303  |
| 5.16667 | 264.15925 | 5.16667 | 263.8914  | 5.16667 | 263.6349  |
| 5.25    | 261.32354 | 5.25    | 263.39401 | 5.25    | 266.63912 |
| 5.33333 | 266.58541 | 5.33333 | 271.65053 | 5.33333 | 269.05452 |
| 5.41667 | 262.24296 | 5.41667 | 265.99828 | 5.41667 | 257.81053 |
| 5.5     | 260.69791 | 5.5     | 254.44976 | 5.5     | 264.34925 |

|         |           |         |           |         |           |
|---------|-----------|---------|-----------|---------|-----------|
| 5.58333 | 257.26254 | 5.58333 | 247.55011 | 5.58333 | 251.31463 |
| 5.66667 | 253.94603 | 5.66667 | 249.39582 | 5.66667 | 239.29004 |
| 5.75    | 267.25546 | 5.75    | 261.57414 | 5.75    | 263.45936 |
| 5.83333 | 265.91739 | 5.83333 | 259.20803 | 5.83333 | 260.15868 |
| 5.91667 | 267.89778 | 5.91667 | 274.86419 | 5.91667 | 276.23717 |
| 6       | 265.35264 | 6       | 271.01686 | 6       | 268.75181 |
| 6.08333 | 253.56496 | 6.08333 | 249.00764 | 6.08333 | 255.21339 |
| 6.16667 | 259.61566 | 6.16667 | 261.14246 | 6.16667 | 266.73328 |
| 6.25    | 254.41713 | 6.25    | 251.28627 | 6.25    | 243.82193 |
| 6.33333 | 266.76245 | 6.33333 | 273.16955 | 6.33333 | 270.27305 |
| 6.41667 | 252.5047  | 6.41667 | 250.51496 | 6.41667 | 237.59203 |
| 6.5     | 253.45514 | 6.5     | 248.0165  | 6.5     | 238.77401 |
| 6.58333 | 253.61497 | 6.58333 | 247.84878 | 6.58333 | 256.33702 |
| 6.66667 | 257.69105 | 6.66667 | 257.50963 | 6.66667 | 255.72074 |
| 6.75    | 256.11063 | 6.75    | 250.57659 | 6.75    | 242.92836 |
| 6.83333 | 259.83173 | 6.83333 | 260.07103 | 6.83333 | 269.73391 |
| 6.91667 | 257.93234 | 6.91667 | 263.82558 | 6.91667 | 266.04483 |

|         |           |         |           |         |           |
|---------|-----------|---------|-----------|---------|-----------|
| 7       | 260.82637 | 7       | 257.68549 | 7       | 270.95686 |
| 7.08333 | 267.74341 | 7.08333 | 261.14407 | 7.08333 | 272.27845 |
| 7.16667 | 257.83487 | 7.16667 | 265.52557 | 7.16667 | 246.3357  |
| 7.25    | 264.38339 | 7.25    | 263.23782 | 7.25    | 266.73429 |
| 7.33333 | 259.55369 | 7.33333 | 250.82335 | 7.33333 | 259.31283 |
| 7.41667 | 253.99511 | 7.41667 | 244.67298 | 7.41667 | 258.93938 |
| 7.5     | 256.40687 | 7.5     | 248.11852 | 7.5     | 255.45791 |
| 7.58333 | 255.63725 | 7.58333 | 256.6396  | 7.58333 | 256.04729 |
| 7.66667 | 257.14039 | 7.66667 | 261.11218 | 7.66667 | 249.93017 |
| 7.75    | 262.96412 | 7.75    | 260.21641 | 7.75    | 267.06426 |
| 7.83333 | 257.33807 | 7.83333 | 248.18893 | 7.83333 | 243.04423 |
| 7.91667 | 259.50895 | 7.91667 | 256.06086 | 7.91667 | 251.70292 |
| 8       | 262.67874 | 8       | 270.48765 | 8       | 269.53781 |
| 8.08333 | 264.73066 | 8.08333 | 263.94653 | 8.08333 | 257.30576 |
| 8.16667 | 266.92312 | 8.16667 | 274.3903  | 8.16667 | 274.7026  |
| 8.25    | 261.79865 | 8.25    | 267.10138 | 8.25    | 256.99569 |
| 8.33333 | 255.55613 | 8.33333 | 245.53935 | 8.33333 | 263.57267 |

|         |           |         |           |         |           |
|---------|-----------|---------|-----------|---------|-----------|
| 8.41667 | 254.44752 | 8.41667 | 257.10675 | 8.41667 | 257.85534 |
| 8.5     | 255.72982 | 8.5     | 257.70406 | 8.5     | 250.2572  |
| 8.58333 | 258.41401 | 8.58333 | 257.79071 | 8.58333 | 258.49721 |
| 8.66667 | 257.53562 | 8.66667 | 252.04444 | 8.66667 | 267.24291 |
| 8.75    | 255.42938 | 8.75    | 256.67255 | 8.75    | 259.9607  |
| 8.83333 | 257.01142 | 8.83333 | 248.73797 | 8.83333 | 261.41274 |
| 8.91667 | 263.56197 | 8.91667 | 261.04074 | 8.91667 | 260.32938 |
| 9       | 260.20358 | 9       | 258.05976 | 9       | 257.66295 |
| 9.08333 | 263.86147 | 9.08333 | 270.92425 | 9.08333 | 252.86162 |
| 9.16667 | 264.89633 | 9.16667 | 270.54127 | 9.16667 | 266.54901 |
| 9.25    | 263.60483 | 9.25    | 257.92072 | 9.25    | 273.12835 |
| 9.33333 | 261.22052 | 9.33333 | 259.92513 | 9.33333 | 265.54607 |
| 9.41667 | 254.22299 | 9.41667 | 247.23338 | 9.41667 | 256.86767 |
| 9.5     | 267.06292 | 9.5     | 273.44146 | 9.5     | 265.83764 |
| 9.58333 | 257.42207 | 9.58333 | 262.81146 | 9.58333 | 265.69614 |
| 9.66667 | 265.56325 | 9.66667 | 260.4886  | 9.66667 | 263.65306 |
| 9.75    | 262.56437 | 9.75    | 263.80525 | 9.75    | 267.54811 |

|          |           |          |           |          |           |
|----------|-----------|----------|-----------|----------|-----------|
| 9.83333  | 259.99104 | 9.83333  | 260.6743  | 9.83333  | 255.67363 |
| 9.91667  | 257.91225 | 9.91667  | 250.35516 | 9.91667  | 242.56879 |
| 10       | 267.1781  | 10       | 270.75188 | 10       | 266.18393 |
| 10.08333 | 263.83438 | 10.08333 | 263.2426  | 10.08333 | 272.0486  |
| 10.16667 | 262.16394 | 10.16667 | 265.96636 | 10.16667 | 250.11357 |
| 10.25    | 252.78006 | 10.25    | 252.05331 | 10.25    | 242.57988 |
| 10.33333 | 267.16504 | 10.33333 | 256.48912 | 10.33333 | 273.1685  |
| 10.41667 | 262.31904 | 10.41667 | 257.77856 | 10.41667 | 259.747   |
| 10.5     | 263.21529 | 10.5     | 253.04544 | 10.5     | 255.36305 |
| 10.58333 | 262.73255 | 10.58333 | 269.31059 | 10.58333 | 266.43629 |
| 10.66667 | 255.72693 | 10.66667 | 261.22788 | 10.66667 | 246.21824 |
| 10.75    | 266.0565  | 10.75    | 270.90325 | 10.75    | 273.83785 |
| 10.83333 | 257.5752  | 10.83333 | 252.81676 | 10.83333 | 262.21285 |
| 10.91667 | 259.85762 | 10.91667 | 250.51704 | 10.91667 | 259.66143 |
| 11       | 267.56989 | 11       | 273.3122  | 11       | 253.86415 |
| 11.08333 | 267.43562 | 11.08333 | 274.46543 | 11.08333 | 265.85561 |
| 11.16667 | 255.81334 | 11.16667 | 247.11466 | 11.16667 | 250.25349 |

|          |           |          |           |          |           |
|----------|-----------|----------|-----------|----------|-----------|
| 11.25    | 258.4641  | 11.25    | 256.91822 | 11.25    | 254.28266 |
| 11.33333 | 258.51535 | 11.33333 | 249.42724 | 11.33333 | 251.47753 |
| 11.41667 | 262.76487 | 11.41667 | 266.24441 | 11.41667 | 252.03434 |
| 11.5     | 262.3842  | 11.5     | 265.95472 | 11.5     | 269.71889 |
| 11.58333 | 256.72473 | 11.58333 | 248.76293 | 11.58333 | 259.21984 |
| 11.66667 | 257.87431 | 11.66667 | 256.13881 | 11.66667 | 243.31937 |
| 11.75    | 253.71122 | 11.75    | 253.3271  | 11.75    | 243.47879 |
| 11.83333 | 266.94877 | 11.83333 | 261.22379 | 11.83333 | 268.96637 |
| 11.91667 | 266.9726  | 11.91667 | 272.59771 | 11.91667 | 268.95701 |
| 12       | 259.6946  | 12       | 256.99897 | 12       | 248.10469 |
| 12.08333 | 263.79106 | 12.08333 | 257.15039 | 12.08333 | 271.46395 |
| 12.16667 | 267.09425 | 12.16667 | 266.49356 | 12.16667 | 259.75958 |
| 12.25    | 261.16501 | 12.25    | 264.06263 | 12.25    | 268.97854 |
| 12.33333 | 264.03417 | 12.33333 | 257.19067 | 12.33333 | 248.69352 |
| 12.41667 | 260.21008 | 12.41667 | 255.47946 | 12.41667 | 262.92875 |
| 12.5     | 263.17296 | 12.5     | 270.97867 | 12.5     | 273.01747 |
| 12.58333 | 267.0419  | 12.58333 | 268.50822 | 12.58333 | 277.49792 |

|          |           |          |           |          |           |
|----------|-----------|----------|-----------|----------|-----------|
| 12.66667 | 268.12213 | 12.66667 | 265.61975 | 12.66667 | 274.49969 |
| 12.75    | 260.68388 | 12.75    | 259.7011  | 12.75    | 252.98197 |
| 12.83333 | 254.91212 | 12.83333 | 246.87474 | 12.83333 | 261.8623  |
| 12.91667 | 267.79715 | 12.91667 | 261.29744 | 12.91667 | 263.18755 |
| 13       | 259.4264  | 13       | 255.18893 | 13       | 269.18057 |
| 13.08333 | 261.15695 | 13.08333 | 261.46564 | 13.08333 | 271.44576 |
| 13.16667 | 260.03729 | 13.16667 | 253.82448 | 13.16667 | 251.71271 |
| 13.25    | 258.47445 | 13.25    | 252.11986 | 13.25    | 267.81133 |
| 13.33333 | 258.7852  | 13.33333 | 249.71996 | 13.33333 | 253.23633 |
| 13.41667 | 260.1106  | 13.41667 | 261.19709 | 13.41667 | 262.68154 |
| 13.5     | 254.75778 | 13.5     | 248.65022 | 13.5     | 264.80212 |
| 13.58333 | 256.55286 | 13.58333 | 262.55081 | 13.58333 | 248.48787 |
| 13.66667 | 258.52578 | 13.66667 | 263.74128 | 13.66667 | 250.25916 |
| 13.75    | 261.01762 | 13.75    | 251.87156 | 13.75    | 250.62546 |
| 13.83333 | 259.8257  | 13.83333 | 253.76137 | 13.83333 | 253.5717  |
| 13.91667 | 263.21479 | 13.91667 | 265.01202 | 13.91667 | 259.69192 |
| 14       | 262.36499 | 14       | 255.80508 | 14       | 258.16374 |

|          |           |          |           |          |           |
|----------|-----------|----------|-----------|----------|-----------|
| 14.08333 | 260.77987 | 14.08333 | 252.76402 | 14.08333 | 270.46133 |
| 14.16667 | 259.2942  | 14.16667 | 265.90257 | 14.16667 | 257.90361 |
| 14.25    | 262.00735 | 14.25    | 262.00028 | 14.25    | 263.54193 |
| 14.33333 | 253.32715 | 14.33333 | 251.5759  | 14.33333 | 253.51132 |
| 14.41667 | 255.17635 | 14.41667 | 258.98434 | 14.41667 | 245.04253 |
| 14.5     | 265.32748 | 14.5     | 269.71202 | 14.5     | 254.27526 |
| 14.58333 | 256.07878 | 14.58333 | 249.2489  | 14.58333 | 263.30967 |
| 14.66667 | 253.09269 | 14.66667 | 244.68622 | 14.66667 | 252.55285 |
| 14.75    | 252.8833  | 14.75    | 250.39846 | 14.75    | 244.37782 |
| 14.83333 | 253.43577 | 14.83333 | 250.81296 | 14.83333 | 260.45873 |
| 14.91667 | 264.97745 | 14.91667 | 263.04099 | 14.91667 | 258.89171 |
| 15       | 266.99382 | 15       | 269.9401  | 15       | 253.7592  |
| 15.08333 | 259.05881 | 15.08333 | 260.90746 | 15.08333 | 244.63235 |
| 15.16667 | 260.35129 | 15.16667 | 267.87336 | 15.16667 | 248.48839 |
| 15.25    | 265.48811 | 15.25    | 256.69753 | 15.25    | 273.07125 |
| 15.33333 | 261.26352 | 15.33333 | 258.17617 | 15.33333 | 248.56455 |
| 15.41667 | 257.40813 | 15.41667 | 253.22551 | 15.41667 | 251.82907 |

|          |           |          |           |          |           |
|----------|-----------|----------|-----------|----------|-----------|
| 15.5     | 266.70128 | 15.5     | 272.11985 | 15.5     | 254.64025 |
| 15.58333 | 260.85936 | 15.58333 | 254.96551 | 15.58333 | 254.72969 |
| 15.66667 | 259.54532 | 15.66667 | 252.61936 | 15.66667 | 249.31093 |
| 15.75    | 256.41297 | 15.75    | 254.20858 | 15.75    | 258.74094 |
| 15.83333 | 265.07421 | 15.83333 | 262.29941 | 15.83333 | 250.28519 |
| 15.91667 | 254.87142 | 15.91667 | 249.64605 | 15.91667 | 254.69811 |
| 16       | 253.91094 | 16       | 248.19439 | 16       | 255.88789 |
| 16.08333 | 256.64802 | 16.08333 | 262.96901 | 16.08333 | 246.12314 |
| 16.16667 | 252.82034 | 16.16667 | 250.54976 | 16.16667 | 241.93946 |
| 16.25    | 253.6943  | 16.25    | 258.84277 | 16.25    | 243.26822 |
| 16.33333 | 257.08263 | 16.33333 | 256.70292 | 16.33333 | 247.85619 |
| 16.41667 | 263.49207 | 16.41667 | 253.88542 | 16.41667 | 273.98749 |
| 16.5     | 256.99138 | 16.5     | 264.68827 | 16.5     | 258.20721 |
| 16.58333 | 253.29694 | 16.58333 | 257.98851 | 16.58333 | 247.52177 |
| 16.66667 | 264.39251 | 16.66667 | 271.75055 | 16.66667 | 255.57925 |
| 16.75    | 265.00659 | 16.75    | 271.59095 | 16.75    | 251.54956 |
| 16.83333 | 266.67295 | 16.83333 | 271.8488  | 16.83333 | 271.44133 |

|          |           |          |           |          |           |
|----------|-----------|----------|-----------|----------|-----------|
| 16.91667 | 260.18622 | 16.91667 | 252.80786 | 16.91667 | 256.33676 |
| 17       | 266.52022 | 17       | 264.91976 | 17       | 251.96581 |
| 17.08333 | 264.57508 | 17.08333 | 257.95065 | 17.08333 | 254.76702 |
| 17.16667 | 258.98433 | 17.16667 | 255.89542 | 17.16667 | 258.64894 |
| 17.25    | 258.39142 | 17.25    | 249.1162  | 17.25    | 260.53348 |
| 17.33333 | 267.25941 | 17.33333 | 263.65889 | 17.33333 | 254.55764 |
| 17.41667 | 257.34047 | 17.41667 | 264.79614 | 17.41667 | 252.16561 |
| 17.5     | 263.06152 | 17.5     | 257.42253 | 17.5     | 262.90868 |
| 17.58333 | 254.69348 | 17.58333 | 258.48459 | 17.58333 | 239.61486 |
| 17.66667 | 263.09565 | 17.66667 | 260.95169 | 17.66667 | 252.21744 |
| 17.75    | 263.11362 | 17.75    | 260.38014 | 17.75    | 267.09585 |
| 17.83333 | 267.55013 | 17.83333 | 274.7772  | 17.83333 | 271.30012 |
| 17.91667 | 253.49269 | 17.91667 | 261.01635 | 17.91667 | 258.63149 |
| 18       | 264.694   | 18       | 264.4039  | 18       | 267.69378 |
| 18.08333 | 253.01738 | 18.08333 | 255.62068 | 18.08333 | 252.28692 |
| 18.16667 | 267.20273 | 18.16667 | 259.41003 | 18.16667 | 255.81749 |
| 18.25    | 261.27168 | 18.25    | 256.24743 | 18.25    | 253.24933 |

|          |           |          |           |          |           |
|----------|-----------|----------|-----------|----------|-----------|
| 18.33333 | 258.58398 | 18.33333 | 265.7752  | 18.33333 | 246.5681  |
| 18.41667 | 256.79155 | 18.41667 | 256.93099 | 18.41667 | 263.12634 |
| 18.5     | 266.14303 | 18.5     | 265.5985  | 18.5     | 255.15824 |
| 18.58333 | 258.7742  | 18.58333 | 261.97213 | 18.58333 | 255.01033 |
| 18.66667 | 257.07106 | 18.66667 | 247.81702 | 18.66667 | 257.20988 |
| 18.75    | 263.06955 | 18.75    | 263.3042  | 18.75    | 271.66666 |
| 18.83333 | 254.78557 | 18.83333 | 253.5626  | 18.83333 | 243.82342 |
| 18.91667 | 264.99934 | 18.91667 | 270.21717 | 18.91667 | 253.14273 |
| 19       | 259.82959 | 19       | 252.29973 | 19       | 250.85222 |
| 19.08333 | 261.7688  | 19.08333 | 268.90331 | 19.08333 | 262.65384 |
| 19.16667 | 266.79442 | 19.16667 | 257.61883 | 19.16667 | 252.66499 |
| 19.25    | 261.48871 | 19.25    | 254.4306  | 19.25    | 250.7478  |
| 19.33333 | 255.05408 | 19.33333 | 255.47543 | 19.33333 | 259.43871 |
| 19.41667 | 259.09586 | 19.41667 | 260.97819 | 19.41667 | 258.88366 |
| 19.5     | 262.82229 | 19.5     | 256.6365  | 19.5     | 261.28583 |
| 19.58333 | 252.63296 | 19.58333 | 244.64774 | 19.58333 | 257.30212 |
| 19.66667 | 255.27346 | 19.66667 | 260.97116 | 19.66667 | 244.84656 |

|          |           |          |           |          |           |
|----------|-----------|----------|-----------|----------|-----------|
| 19.75    | 264.90324 | 19.75    | 258.87272 | 19.75    | 272.98094 |
| 19.83333 | 254.53183 | 19.83333 | 254.94315 | 19.83333 | 262.58369 |
| 19.91667 | 263.98872 | 19.91667 | 264.87493 | 19.91667 | 264.16691 |
| 20       | 258.82377 | 20       | 256.06626 | 20       | 247.48677 |
| 20.08333 | 262.30204 | 20.08333 | 262.52684 | 20.08333 | 263.34155 |
| 20.16667 | 262.36599 | 20.16667 | 261.47263 | 20.16667 | 260.23479 |
| 20.25    | 255.83069 | 20.25    | 262.33621 | 20.25    | 251.6476  |
| 20.33333 | 257.79775 | 20.33333 | 251.17183 | 20.33333 | 265.63223 |
| 20.41667 | 261.58254 | 20.41667 | 264.23316 | 20.41667 | 268.44594 |
| 20.5     | 260.78787 | 20.5     | 254.7136  | 20.5     | 247.86062 |
| 20.58333 | 262.77968 | 20.58333 | 259.54881 | 20.58333 | 257.66547 |
| 20.66667 | 267.80903 | 20.66667 | 269.68852 | 20.66667 | 256.88323 |
| 20.75    | 258.84394 | 20.75    | 253.92591 | 20.75    | 265.50244 |
| 20.83333 | 256.31902 | 20.83333 | 251.73911 | 20.83333 | 261.99367 |
| 20.91667 | 254.0019  | 20.91667 | 257.2102  | 20.91667 | 241.00666 |
| 21       | 258.57969 | 21       | 249.54957 | 21       | 266.93259 |
| 21.08333 | 258.98865 | 21.08333 | 256.93746 | 21.08333 | 266.49104 |

|          |           |          |           |          |           |
|----------|-----------|----------|-----------|----------|-----------|
| 21.16667 | 257.50331 | 21.16667 | 265.2006  | 21.16667 | 248.26821 |
| 21.25    | 262.54648 | 21.25    | 270.3512  | 21.25    | 272.82675 |
| 21.33333 | 265.44014 | 21.33333 | 256.18371 | 21.33333 | 269.23991 |
| 21.41667 | 262.41569 | 21.41667 | 255.83456 | 21.41667 | 267.30397 |
| 21.5     | 252.96372 | 21.5     | 247.54119 | 21.5     | 250.51124 |
| 21.58333 | 256.54619 | 21.58333 | 263.04399 | 21.58333 | 265.59149 |
| 21.66667 | 265.83611 | 21.66667 | 271.59412 | 21.66667 | 265.50781 |
| 21.75    | 257.031   | 21.75    | 262.56976 | 21.75    | 265.35906 |
| 21.83333 | 257.01232 | 21.83333 | 253.37997 | 21.83333 | 261.63212 |
| 21.91667 | 256.52072 | 21.91667 | 249.09239 | 21.91667 | 258.09575 |
| 22       | 259.18624 | 22       | 263.94542 | 22       | 245.35269 |
| 22.08333 | 266.67616 | 22.08333 | 269.14238 | 22.08333 | 252.8466  |
| 22.16667 | 253.88411 | 22.16667 | 254.5993  | 22.16667 | 261.90507 |
| 22.25    | 262.3074  | 22.25    | 269.94212 | 22.25    | 270.75449 |
| 22.33333 | 266.05579 | 22.33333 | 267.59306 | 22.33333 | 259.78645 |
| 22.41667 | 264.38913 | 22.41667 | 253.95845 | 22.41667 | 274.15989 |
| 22.5     | 257.05999 | 22.5     | 261.48065 | 22.5     | 257.288   |

|          |           |          |           |          |           |
|----------|-----------|----------|-----------|----------|-----------|
| 22.58333 | 253.49974 | 22.58333 | 248.67234 | 22.58333 | 257.11921 |
| 22.66667 | 255.24309 | 22.66667 | 256.88609 | 22.66667 | 246.13576 |
| 22.75    | 253.91964 | 22.75    | 260.45173 | 22.75    | 252.31411 |
| 22.83333 | 253.65249 | 22.83333 | 245.89072 | 22.83333 | 256.5667  |
| 22.91667 | 267.13624 | 22.91667 | 258.60925 | 22.91667 | 266.59021 |
| 23       | 254.68179 | 23       | 246.40285 | 23       | 247.81964 |
| 23.08333 | 265.91858 | 23.08333 | 265.5798  | 23.08333 | 268.11188 |
| 23.16667 | 259.49435 | 23.16667 | 254.06157 | 23.16667 | 259.70635 |
| 23.25    | 262.0229  | 23.25    | 262.63551 | 23.25    | 263.61181 |
| 23.33333 | 256.25597 | 23.33333 | 258.87824 | 23.33333 | 265.16676 |
| 23.41667 | 254.61764 | 23.41667 | 248.06174 | 23.41667 | 259.87982 |
| 23.5     | 254.98435 | 23.5     | 256.10552 | 23.5     | 262.2537  |
| 23.58333 | 264.7818  | 23.58333 | 259.08343 | 23.58333 | 254.53581 |
| 23.66667 | 260.60582 | 23.66667 | 259.09352 | 23.66667 | 264.31815 |
| 23.75    | 267.42031 | 23.75    | 273.67099 | 23.75    | 277.18703 |
| 23.83333 | 259.95297 | 23.83333 | 264.95109 | 23.83333 | 260.05279 |
| 23.91667 | 266.77945 | 23.91667 | 257.83193 | 23.91667 | 273.1979  |

|          |           |          |           |          |           |
|----------|-----------|----------|-----------|----------|-----------|
| 24       | 257.71434 | 24       | 255.04699 | 24       | 262.9462  |
| 24.08333 | 264.50384 | 24.08333 | 259.0466  | 24.08333 | 253.56132 |
| 24.16667 | 266.19434 | 24.16667 | 255.61258 | 24.16667 | 257.31064 |
| 24.25    | 260.16949 | 24.25    | 263.80614 | 24.25    | 265.09658 |
| 24.33333 | 266.08266 | 24.33333 | 267.3061  | 24.33333 | 257.75773 |
| 24.41667 | 252.76824 | 24.41667 | 247.29252 | 24.41667 | 260.28102 |
| 24.5     | 260.74926 | 24.5     | 263.84852 | 24.5     | 257.65886 |
| 24.58333 | 253.07868 | 24.58333 | 252.72893 | 24.58333 | 239.34739 |
| 24.66667 | 260.59223 | 24.66667 | 257.97015 | 24.66667 | 264.1527  |
| 24.75    | 260.19534 | 24.75    | 249.96367 | 24.75    | 257.37872 |
| 24.83333 | 254.67437 | 24.83333 | 245.82876 | 24.83333 | 247.1164  |
| 24.91667 | 263.05675 | 24.91667 | 268.79586 | 24.91667 | 258.84416 |
| 25       | 262.02386 | 25       | 268.12247 | 25       | 261.46418 |
| 25.08333 | 267.45943 | 25.08333 | 266.97559 | 25.08333 | 269.61114 |
| 25.16667 | 266.6789  | 25.16667 | 271.59166 | 25.16667 | 272.71065 |
| 25.25    | 257.80114 | 25.25    | 258.00119 | 25.25    | 245.74043 |
| 25.33333 | 262.29992 | 25.33333 | 254.52718 | 25.33333 | 263.49653 |

|          |           |          |           |          |           |
|----------|-----------|----------|-----------|----------|-----------|
| 25.41667 | 267.65945 | 25.41667 | 259.34086 | 25.41667 | 277.24166 |
| 25.5     | 256.62028 | 25.5     | 251.89282 | 25.5     | 257.83461 |
| 25.58333 | 254.93393 | 25.58333 | 260.77931 | 25.58333 | 240.86719 |
| 25.66667 | 252.89312 | 25.66667 | 256.87088 | 25.66667 | 246.59406 |
| 25.75    | 264.84409 | 25.75    | 270.20692 | 25.75    | 267.79181 |
| 25.83333 | 266.14471 | 25.83333 | 272.24608 | 25.83333 | 265.23343 |
| 25.91667 | 265.27223 | 25.91667 | 258.56217 | 25.91667 | 250.79234 |
| 26       | 260.57624 | 26       | 254.70467 | 26       | 255.10804 |
| 26.08333 | 256.17922 | 26.08333 | 247.77552 | 26.08333 | 253.29977 |
| 26.16667 | 266.68506 | 26.16667 | 270.5808  | 26.16667 | 266.80027 |
| 26.25    | 263.74702 | 26.25    | 269.52018 | 26.25    | 264.66011 |
| 26.33333 | 255.5783  | 26.33333 | 252.62535 | 26.33333 | 261.68407 |
| 26.41667 | 253.45881 | 26.41667 | 254.33223 | 26.41667 | 262.39627 |
| 26.5     | 265.25933 | 26.5     | 257.5188  | 26.5     | 269.31674 |
| 26.58333 | 261.25763 | 26.58333 | 267.81311 | 26.58333 | 264.01939 |
| 26.66667 | 252.69509 | 26.66667 | 257.8809  | 26.66667 | 257.14555 |
| 26.75    | 255.33254 | 26.75    | 262.56713 | 26.75    | 245.32401 |

|          |           |          |           |          |           |
|----------|-----------|----------|-----------|----------|-----------|
| 26.83333 | 265.68582 | 26.83333 | 270.13712 | 26.83333 | 253.76716 |
| 26.91667 | 260.67932 | 26.91667 | 266.3358  | 26.91667 | 259.99556 |
| 27       | 253.74528 | 27       | 244.03572 | 27       | 245.58281 |
| 27.08333 | 265.75787 | 27.08333 | 268.83003 | 27.08333 | 264.4405  |
| 27.16667 | 254.71977 | 27.16667 | 250.45398 | 27.16667 | 251.20464 |
| 27.25    | 256.16857 | 27.25    | 262.613   | 27.25    | 261.23635 |
| 27.33333 | 255.07518 | 27.33333 | 259.19618 | 27.33333 | 256.76046 |
| 27.41667 | 255.59836 | 27.41667 | 260.83404 | 27.41667 | 254.17749 |
| 27.5     | 264.52943 | 27.5     | 268.96083 | 27.5     | 274.37125 |
| 27.58333 | 252.83913 | 27.58333 | 247.44759 | 27.58333 | 262.10037 |
| 27.66667 | 265.19451 | 27.66667 | 269.20319 | 27.66667 | 264.77763 |
| 27.75    | 264.23161 | 27.75    | 255.66178 | 27.75    | 260.61349 |
| 27.83333 | 256.34376 | 27.83333 | 261.74031 | 27.83333 | 250.6701  |
| 27.91667 | 265.11833 | 27.91667 | 270.44773 | 27.91667 | 258.63168 |
| 28       | 260.26698 | 28       | 253.90866 | 28       | 250.22146 |
| 28.08333 | 266.98379 | 28.08333 | 271.5655  | 28.08333 | 269.61171 |
| 28.16667 | 262.88877 | 28.16667 | 260.84376 | 28.16667 | 258.94623 |

|          |           |          |           |          |           |
|----------|-----------|----------|-----------|----------|-----------|
| 28.25    | 252.68682 | 28.25    | 247.9775  | 28.25    | 253.93636 |
| 28.33333 | 261.43043 | 28.33333 | 265.52809 | 28.33333 | 255.1561  |
| 28.41667 | 259.67106 | 28.41667 | 253.4213  | 28.41667 | 248.00845 |
| 28.5     | 256.29823 | 28.5     | 246.47099 | 28.5     | 257.42876 |
| 28.58333 | 266.94206 | 28.58333 | 259.87317 | 28.58333 | 259.48263 |
| 28.66667 | 255.04666 | 28.66667 | 250.70525 | 28.66667 | 239.96549 |
| 28.75    | 267.20318 | 28.75    | 272.68218 | 28.75    | 251.75242 |
| 28.83333 | 254.13522 | 28.83333 | 261.17019 | 28.83333 | 254.80512 |
| 28.91667 | 262.36005 | 28.91667 | 256.9919  | 28.91667 | 272.77129 |
| 29       | 266.58574 | 29       | 267.89307 | 29       | 252.95574 |
| 29.08333 | 259.54006 | 29.08333 | 256.41961 | 29.08333 | 251.23478 |
| 29.16667 | 254.48966 | 29.16667 | 261.78843 | 29.16667 | 242.3388  |
| 29.25    | 256.2187  | 29.25    | 255.58712 | 29.25    | 242.10976 |
| 29.33333 | 256.92079 | 29.33333 | 263.53573 | 29.33333 | 263.09665 |
| 29.41667 | 255.91513 | 29.41667 | 247.74478 | 29.41667 | 243.61201 |
| 29.5     | 256.11716 | 29.5     | 263.27    | 29.5     | 250.26206 |
| 29.58333 | 267.22024 | 29.58333 | 259.87169 | 29.58333 | 269.78529 |

|          |           |          |           |          |           |
|----------|-----------|----------|-----------|----------|-----------|
| 29.66667 | 254.7223  | 29.66667 | 261.69583 | 29.66667 | 253.49148 |
| 29.75    | 253.5601  | 29.75    | 248.1296  | 29.75    | 240.09175 |
| 29.83333 | 258.0314  | 29.83333 | 249.66809 | 29.83333 | 250.26749 |
| 29.91667 | 265.19106 | 29.91667 | 262.65026 | 29.91667 | 275.69368 |
| 30       | 258.53312 | 30       | 261.37647 | 30       | 251.07936 |
| 30.08333 | 253.88975 | 30.08333 | 249.30882 | 30.08333 | 250.77173 |
| 30.16667 | 264.23107 | 30.16667 | 264.87447 | 30.16667 | 258.79663 |
| 30.25    | 255.32544 | 30.25    | 254.25307 | 30.25    | 251.21164 |
| 30.33333 | 265.57379 | 30.33333 | 262.11177 | 30.33333 | 271.06851 |
| 30.41667 | 259.2703  | 30.41667 | 259.3639  | 30.41667 | 251.65398 |
| 30.5     | 254.9655  | 30.5     | 249.31317 | 30.5     | 255.16462 |
| 30.58333 | 264.15279 | 30.58333 | 266.69262 | 30.58333 | 269.46358 |
| 30.66667 | 261.69249 | 30.66667 | 251.25567 | 30.66667 | 255.68743 |
| 30.75    | 261.42049 | 30.75    | 267.9011  | 30.75    | 262.25939 |
| 30.83333 | 253.0878  | 30.83333 | 252.50367 | 30.83333 | 240.05353 |
| 30.91667 | 261.54924 | 30.91667 | 264.25889 | 30.91667 | 251.47985 |
| 31       | 267.12931 | 31       | 270.31803 | 31       | 252.85205 |

|          |           |          |           |          |           |
|----------|-----------|----------|-----------|----------|-----------|
| 31.08333 | 255.44277 | 31.08333 | 257.21657 | 31.08333 | 258.83199 |
| 31.16667 | 260.44647 | 31.16667 | 256.66896 | 31.16667 | 254.78671 |
| 31.25    | 254.04708 | 31.25    | 245.12952 | 31.25    | 261.70127 |
| 31.33333 | 265.09405 | 31.33333 | 266.81636 | 31.33333 | 258.92213 |
| 31.41667 | 261.48643 | 31.41667 | 257.07097 | 31.41667 | 263.68789 |
| 31.5     | 264.95608 | 31.5     | 260.17998 | 31.5     | 270.26713 |
| 31.58333 | 255.43125 | 31.58333 | 260.37665 | 31.58333 | 252.01869 |
| 31.66667 | 254.5865  | 31.66667 | 257.22987 | 31.66667 | 243.17721 |
| 31.75    | 259.32064 | 31.75    | 254.39952 | 31.75    | 257.19473 |
| 31.83333 | 265.31174 | 31.83333 | 260.44327 | 31.83333 | 249.48695 |
| 31.91667 | 258.38828 | 31.91667 | 255.43955 | 31.91667 | 247.14503 |
| 32       | 253.81124 | 32       | 250.80814 | 32       | 243.00395 |
| 32.08333 | 253.78482 | 32.08333 | 248.88576 | 32.08333 | 261.40903 |
| 32.16667 | 262.14345 | 32.16667 | 253.99341 | 32.16667 | 270.78632 |
| 32.25    | 263.56099 | 32.25    | 260.77542 | 32.25    | 248.5844  |
| 32.33333 | 260.82535 | 32.33333 | 267.56116 | 32.33333 | 252.53527 |
| 32.41667 | 266.59664 | 32.41667 | 268.57265 | 32.41667 | 252.04073 |

|          |           |          |           |          |           |
|----------|-----------|----------|-----------|----------|-----------|
| 32.5     | 255.22407 | 32.5     | 261.14425 | 32.5     | 260.66239 |
| 32.58333 | 261.56498 | 32.58333 | 262.37217 | 32.58333 | 250.21201 |
| 32.66667 | 265.16122 | 32.66667 | 260.14066 | 32.66667 | 259.82751 |
| 32.75    | 260.74746 | 32.75    | 260.31879 | 32.75    | 258.52458 |
| 32.83333 | 258.25558 | 32.83333 | 247.93259 | 32.83333 | 261.48842 |
| 32.91667 | 261.12177 | 32.91667 | 255.92127 | 32.91667 | 262.80444 |
| 33       | 261.94027 | 33       | 259.34497 | 33       | 256.09691 |
| 33.08333 | 266.43301 | 33.08333 | 266.5926  | 33.08333 | 271.97935 |
| 33.16667 | 262.21014 | 33.16667 | 263.73856 | 33.16667 | 269.57458 |
| 33.25    | 266.41795 | 33.25    | 264.43287 | 33.25    | 266.08652 |
| 33.33333 | 256.71092 | 33.33333 | 254.38794 | 33.33333 | 265.96252 |
| 33.41667 | 266.4969  | 33.41667 | 259.82355 | 33.41667 | 252.6372  |
| 33.5     | 259.56554 | 33.5     | 257.78051 | 33.5     | 263.31782 |
| 33.58333 | 258.20897 | 33.58333 | 264.16921 | 33.58333 | 262.25743 |
| 33.66667 | 264.27227 | 33.66667 | 268.42716 | 33.66667 | 251.6908  |
| 33.75    | 259.98088 | 33.75    | 252.6697  | 33.75    | 247.31253 |
| 33.83333 | 252.75492 | 33.83333 | 244.14508 | 33.83333 | 254.06419 |

|          |           |          |           |          |           |
|----------|-----------|----------|-----------|----------|-----------|
| 33.91667 | 261.68194 | 33.91667 | 260.65667 | 33.91667 | 257.08785 |
| 34       | 259.70053 | 34       | 260.8188  | 34       | 258.53577 |
| 34.08333 | 255.00021 | 34.08333 | 250.78327 | 34.08333 | 255.63796 |
| 34.16667 | 253.21413 | 34.16667 | 257.5922  | 34.16667 | 245.07254 |
| 34.25    | 258.80497 | 34.25    | 262.06074 | 34.25    | 247.65566 |
| 34.33333 | 264.43359 | 34.33333 | 266.31001 | 34.33333 | 252.67873 |
| 34.41667 | 256.36607 | 34.41667 | 250.14278 | 34.41667 | 258.24369 |
| 34.5     | 261.21618 | 34.5     | 254.40862 | 34.5     | 263.74527 |
| 34.58333 | 256.87787 | 34.58333 | 247.04202 | 34.58333 | 251.12869 |
| 34.66667 | 267.32809 | 34.66667 | 261.21671 | 34.66667 | 261.57867 |
| 34.75    | 265.14012 | 34.75    | 263.35308 | 34.75    | 275.10992 |
| 34.83333 | 260.3942  | 34.83333 | 265.4672  | 34.83333 | 262.30445 |
| 34.91667 | 266.36872 | 34.91667 | 257.07192 | 34.91667 | 253.59101 |
| 35       | 253.2079  | 35       | 250.4254  | 35       | 245.55469 |
| 35.08333 | 258.37734 | 35.08333 | 259.43256 | 35.08333 | 249.9669  |
| 35.16667 | 264.44668 | 35.16667 | 257.46793 | 35.16667 | 269.70176 |
| 35.25    | 262.5986  | 35.25    | 264.89502 | 35.25    | 255.9538  |

|          |           |          |           |          |           |
|----------|-----------|----------|-----------|----------|-----------|
| 35.33333 | 263.84424 | 35.33333 | 262.42107 | 35.33333 | 254.23424 |
| 35.41667 | 259.06027 | 35.41667 | 253.12235 | 35.41667 | 265.91889 |
| 35.5     | 257.00954 | 35.5     | 258.53206 | 35.5     | 259.82508 |
| 35.58333 | 263.70034 | 35.58333 | 253.25464 | 35.58333 | 264.98324 |
| 35.66667 | 259.71518 | 35.66667 | 262.97928 | 35.66667 | 260.86702 |
| 35.75    | 264.62784 | 35.75    | 268.30696 | 35.75    | 256.07559 |
| 35.83333 | 255.1613  | 35.83333 | 246.85861 | 35.83333 | 259.46536 |
| 35.91667 | 261.32364 | 35.91667 | 258.64769 | 35.91667 | 268.3279  |
| 36       | 262.79016 | 36       | 255.51402 | 36       | 270.51619 |
| 36.08333 | 260.21928 | 36.08333 | 267.2603  | 36.08333 | 261.00254 |
| 36.16667 | 252.73665 | 36.16667 | 251.79066 | 36.16667 | 258.28649 |
| 36.25    | 254.112   | 36.25    | 244.84072 | 36.25    | 248.90423 |
| 36.33333 | 260.29675 | 36.33333 | 254.4255  | 36.33333 | 245.61263 |
| 36.41667 | 254.53575 | 36.41667 | 259.46967 | 36.41667 | 246.41631 |
| 36.5     | 258.8866  | 36.5     | 256.80308 | 36.5     | 253.0236  |
| 36.58333 | 260.27133 | 36.58333 | 264.46144 | 36.58333 | 255.9477  |
| 36.66667 | 252.69491 | 36.66667 | 254.39554 | 36.66667 | 254.1944  |

|          |           |          |           |          |           |
|----------|-----------|----------|-----------|----------|-----------|
| 36.75    | 255.36345 | 36.75    | 262.8078  | 36.75    | 257.3706  |
| 36.83333 | 255.7579  | 36.83333 | 256.18809 | 36.83333 | 258.52265 |
| 36.91667 | 265.95377 | 36.91667 | 273.00235 | 36.91667 | 250.10053 |
| 37       | 260.93871 | 37       | 266.78374 | 37       | 251.94415 |
| 37.08333 | 268.08433 | 37.08333 | 268.85802 | 37.08333 | 270.49441 |
| 37.16667 | 254.70142 | 37.16667 | 257.33732 | 37.16667 | 250.16467 |
| 37.25    | 259.23877 | 37.25    | 258.02916 | 37.25    | 266.83732 |
| 37.33333 | 260.6123  | 37.33333 | 265.33981 | 37.33333 | 255.43706 |
| 37.41667 | 253.44477 | 37.41667 | 253.02684 | 37.41667 | 240.93955 |
| 37.5     | 255.76586 | 37.5     | 261.5986  | 37.5     | 247.1821  |
| 37.58333 | 264.09607 | 37.58333 | 267.28001 | 37.58333 | 268.57144 |
| 37.66667 | 263.40206 | 37.66667 | 261.61803 | 37.66667 | 253.15098 |
| 37.75    | 261.81544 | 37.75    | 256.09294 | 37.75    | 262.22413 |
| 37.83333 | 254.55229 | 37.83333 | 248.77574 | 37.83333 | 240.78534 |
| 37.91667 | 263.09558 | 37.91667 | 264.31529 | 37.91667 | 253.8775  |
| 38       | 259.13744 | 38       | 262.66352 | 38       | 253.21719 |
| 38.08333 | 258.2301  | 38.08333 | 257.32397 | 38.08333 | 248.67249 |

|          |           |          |           |          |           |
|----------|-----------|----------|-----------|----------|-----------|
| 38.16667 | 253.79062 | 38.16667 | 254.7733  | 38.16667 | 255.28646 |
| 38.25    | 264.04333 | 38.25    | 258.55704 | 38.25    | 270.43397 |
| 38.33333 | 254.72121 | 38.33333 | 245.91397 | 38.33333 | 257.81174 |
| 38.41667 | 253.71385 | 38.41667 | 248.63982 | 38.41667 | 245.3862  |
| 38.5     | 255.29366 | 38.5     | 249.9376  | 38.5     | 257.98956 |
| 38.58333 | 263.78514 | 38.58333 | 259.13725 | 38.58333 | 258.66613 |
| 38.66667 | 260.36901 | 38.66667 | 259.79906 | 38.66667 | 262.76519 |
| 38.75    | 256.25848 | 38.75    | 248.49026 | 38.75    | 241.03365 |
| 38.83333 | 265.19119 | 38.83333 | 258.87646 | 38.83333 | 257.92257 |
| 38.91667 | 257.55737 | 38.91667 | 259.76618 | 38.91667 | 247.75911 |
| 39       | 267.59237 | 39       | 270.12085 | 39       | 257.17098 |
| 39.08333 | 267.2471  | 39.08333 | 257.75876 | 39.08333 | 259.36893 |
| 39.16667 | 259.20929 | 39.16667 | 256.23667 | 39.16667 | 256.7315  |
| 39.25    | 258.74108 | 39.25    | 258.2192  | 39.25    | 264.98191 |
| 39.33333 | 267.79753 | 39.33333 | 264.87961 | 39.33333 | 254.34981 |
| 39.41667 | 266.33904 | 39.41667 | 259.54153 | 39.41667 | 266.78862 |
| 39.5     | 264.73833 | 39.5     | 261.93475 | 39.5     | 252.217   |

|          |           |          |           |          |           |
|----------|-----------|----------|-----------|----------|-----------|
| 39.58333 | 253.37045 | 39.58333 | 259.28386 | 39.58333 | 246.3792  |
| 39.66667 | 268.09358 | 39.66667 | 268.33112 | 39.66667 | 262.55129 |
| 39.75    | 261.13667 | 39.75    | 263.40517 | 39.75    | 250.92362 |
| 39.83333 | 261.01253 | 39.83333 | 266.22521 | 39.83333 | 270.59248 |
| 39.91667 | 257.65342 | 39.91667 | 261.15544 | 39.91667 | 260.08154 |
| 40       | 266.66588 | 40       | 263.09975 | 40       | 259.8467  |
| 40.08333 | 257.2538  | 40.08333 | 247.0699  | 40.08333 | 247.94893 |
| 40.16667 | 256.68036 | 40.16667 | 252.73338 | 40.16667 | 254.61074 |
| 40.25    | 253.87889 | 40.25    | 257.11407 | 40.25    | 255.7741  |
| 40.33333 | 267.83265 | 40.33333 | 273.11994 | 40.33333 | 264.52679 |
| 40.41667 | 263.81559 | 40.41667 | 270.87002 | 40.41667 | 271.31534 |
| 40.5     | 266.76547 | 40.5     | 263.91935 | 40.5     | 260.13341 |
| 40.58333 | 259.18497 | 40.58333 | 262.37968 | 40.58333 | 267.54757 |
| 40.66667 | 257.9502  | 40.66667 | 257.49337 | 40.66667 | 263.77007 |
| 40.75    | 266.15446 | 40.75    | 266.74745 | 40.75    | 256.76533 |
| 40.83333 | 261.51852 | 40.83333 | 255.0951  | 40.83333 | 270.28331 |
| 40.91667 | 267.31399 | 40.91667 | 260.72738 | 40.91667 | 267.15922 |

|          |           |          |           |          |           |
|----------|-----------|----------|-----------|----------|-----------|
| 41       | 258.35978 | 41       | 255.90768 | 41       | 253.80593 |
| 41.08333 | 257.95016 | 41.08333 | 248.15631 | 41.08333 | 243.95043 |
| 41.16667 | 265.38397 | 41.16667 | 261.01283 | 41.16667 | 271.85961 |
| 41.25    | 263.80616 | 41.25    | 265.79526 | 41.25    | 272.20232 |
| 41.33333 | 261.60792 | 41.33333 | 258.54763 | 41.33333 | 246.18927 |
| 41.41667 | 254.31468 | 41.41667 | 247.08019 | 41.41667 | 263.29631 |
| 41.5     | 260.88557 | 41.5     | 258.98554 | 41.5     | 266.06311 |
| 41.58333 | 256.11678 | 41.58333 | 248.16025 | 41.58333 | 260.74583 |
| 41.66667 | 256.08431 | 41.66667 | 256.99546 | 41.66667 | 256.95039 |
| 41.75    | 260.85929 | 41.75    | 250.91742 | 41.75    | 259.7522  |
| 41.83333 | 266.25522 | 41.83333 | 262.9486  | 41.83333 | 276.67033 |
| 41.91667 | 254.93071 | 41.91667 | 254.80503 | 41.91667 | 252.7299  |
| 42       | 266.0163  | 42       | 255.88028 | 42       | 259.46086 |
| 42.08333 | 254.09583 | 42.08333 | 255.36428 | 42.08333 | 251.11402 |
| 42.16667 | 252.71492 | 42.16667 | 245.00687 | 42.16667 | 251.8289  |
| 42.25    | 253.77928 | 42.25    | 251.83    | 42.25    | 260.99474 |
| 42.33333 | 256.98209 | 42.33333 | 247.60738 | 42.33333 | 259.30932 |

|          |           |          |           |          |           |
|----------|-----------|----------|-----------|----------|-----------|
| 42.41667 | 262.37308 | 42.41667 | 258.84075 | 42.41667 | 256.57332 |
| 42.5     | 259.66196 | 42.5     | 253.12263 | 42.5     | 252.63291 |
| 42.58333 | 258.28678 | 42.58333 | 253.86465 | 42.58333 | 253.5622  |
| 42.66667 | 261.50287 | 42.66667 | 264.97719 | 42.66667 | 256.45978 |
| 42.75    | 256.62595 | 42.75    | 253.17151 | 42.75    | 257.66015 |
| 42.83333 | 266.38396 | 42.83333 | 269.75132 | 42.83333 | 252.89162 |
| 42.91667 | 254.6799  | 42.91667 | 259.32399 | 42.91667 | 258.28133 |
| 43       | 268.18997 | 43       | 262.19834 | 43       | 259.47246 |
| 43.08333 | 256.07306 | 43.08333 | 247.2982  | 43.08333 | 247.24033 |
| 43.16667 | 259.4272  | 43.16667 | 249.40216 | 43.16667 | 248.14393 |
| 43.25    | 267.84148 | 43.25    | 267.24124 | 43.25    | 254.50404 |
| 43.33333 | 264.82846 | 43.33333 | 272.77173 | 43.33333 | 263.26306 |
| 43.41667 | 265.3435  | 43.41667 | 261.22988 | 43.41667 | 273.77346 |
| 43.5     | 264.78514 | 43.5     | 266.2441  | 43.5     | 262.34382 |
| 43.58333 | 267.98665 | 43.58333 | 271.9223  | 43.58333 | 252.42333 |
| 43.66667 | 262.29236 | 43.66667 | 263.76723 | 43.66667 | 257.55064 |
| 43.75    | 253.6097  | 43.75    | 256.85489 | 43.75    | 248.1122  |

|          |           |          |           |          |           |
|----------|-----------|----------|-----------|----------|-----------|
| 43.83333 | 258.38575 | 43.83333 | 265.22599 | 43.83333 | 248.20122 |
| 43.91667 | 253.96488 | 43.91667 | 247.35037 | 43.91667 | 239.62882 |
| 44       | 259.48979 | 44       | 249.48049 | 44       | 248.75288 |
| 44.08333 | 268.0799  | 44.08333 | 260.21631 | 44.08333 | 261.91674 |
| 44.16667 | 257.0108  | 44.16667 | 249.00106 | 44.16667 | 255.3171  |
| 44.25    | 254.43796 | 44.25    | 256.18391 | 44.25    | 253.25075 |
| 44.33333 | 258.78737 | 44.33333 | 258.65228 | 44.33333 | 256.79445 |
| 44.41667 | 253.75126 | 44.41667 | 247.47295 | 44.41667 | 251.42512 |
| 44.5     | 268.19624 | 44.5     | 270.60008 | 44.5     | 257.8393  |
| 44.58333 | 260.11653 | 44.58333 | 263.67571 | 44.58333 | 248.98147 |
| 44.66667 | 262.98023 | 44.66667 | 255.54972 | 44.66667 | 251.81067 |
| 44.75    | 264.81845 | 44.75    | 265.48235 | 44.75    | 255.77649 |
| 44.83333 | 254.32131 | 44.83333 | 257.46345 | 44.83333 | 248.80635 |
| 44.91667 | 259.97126 | 44.91667 | 251.65659 | 44.91667 | 260.43894 |
| 45       | 266.51227 | 45       | 271.13653 | 45       | 250.74861 |
| 45.08333 | 263.47371 | 45.08333 | 270.72714 | 45.08333 | 269.87401 |
| 45.16667 | 262.56292 | 45.16667 | 254.04722 | 45.16667 | 265.21822 |

|          |           |          |           |          |           |
|----------|-----------|----------|-----------|----------|-----------|
| 45.25    | 253.64708 | 45.25    | 243.957   | 45.25    | 256.44202 |
| 45.33333 | 267.14971 | 45.33333 | 262.29747 | 45.33333 | 252.85694 |
| 45.41667 | 253.10441 | 45.41667 | 254.98093 | 45.41667 | 260.54518 |
| 45.5     | 261.00067 | 45.5     | 268.06648 | 45.5     | 262.52048 |
| 45.58333 | 258.41167 | 45.58333 | 255.25026 | 45.58333 | 257.27233 |
| 45.66667 | 254.39762 | 45.66667 | 256.95457 | 45.66667 | 258.26294 |
| 45.75    | 266.61745 | 45.75    | 257.37116 | 45.75    | 252.54725 |
| 45.83333 | 258.89429 | 45.83333 | 261.05425 | 45.83333 | 243.50044 |
| 45.91667 | 255.52882 | 45.91667 | 256.52717 | 45.91667 | 249.70097 |
| 46       | 258.16851 | 46       | 249.68329 | 46       | 256.97577 |
| 46.08333 | 262.28143 | 46.08333 | 265.97278 | 46.08333 | 266.20359 |
| 46.16667 | 256.22919 | 46.16667 | 261.23104 | 46.16667 | 246.38486 |
| 46.25    | 265.23221 | 46.25    | 265.77037 | 46.25    | 275.55797 |
| 46.33333 | 254.26434 | 46.33333 | 246.2484  | 46.33333 | 246.83016 |
| 46.41667 | 259.602   | 46.41667 | 267.09645 | 46.41667 | 247.91706 |
| 46.5     | 257.60999 | 46.5     | 261.4185  | 46.5     | 263.04865 |
| 46.58333 | 264.00283 | 46.58333 | 259.85904 | 46.58333 | 266.1336  |

|          |           |          |           |          |           |
|----------|-----------|----------|-----------|----------|-----------|
| 46.66667 | 255.12289 | 46.66667 | 252.56809 | 46.66667 | 246.89135 |
| 46.75    | 253.34003 | 46.75    | 249.77807 | 46.75    | 248.18963 |
| 46.83333 | 259.39921 | 46.83333 | 258.21038 | 46.83333 | 258.24462 |
| 46.91667 | 255.67739 | 46.91667 | 251.55741 | 46.91667 | 246.43491 |
| 47       | 264.40486 | 47       | 269.55282 | 47       | 256.92696 |
| 47.08333 | 255.10658 | 47.08333 | 259.58702 | 47.08333 | 243.8     |
| 47.16667 | 255.57472 | 47.16667 | 247.23992 | 47.16667 | 253.16005 |
| 47.25    | 256.38043 | 47.25    | 263.36808 | 47.25    | 249.21563 |
| 47.33333 | 258.13349 | 47.33333 | 259.29277 | 47.33333 | 260.51916 |
| 47.41667 | 261.41552 | 47.41667 | 266.12361 | 47.41667 | 258.54674 |
| 47.5     | 256.77891 | 47.5     | 259.22139 | 47.5     | 249.2974  |
| 47.58333 | 254.96244 | 47.58333 | 252.53622 | 47.58333 | 261.28551 |
| 47.66667 | 252.74953 | 47.66667 | 255.62229 | 47.66667 | 246.05774 |
| 47.75    | 265.69408 | 47.75    | 273.02272 | 47.75    | 260.90335 |
| 47.83333 | 260.64852 | 47.83333 | 255.1504  | 47.83333 | 257.67322 |
| 47.91667 | 256.4818  | 47.91667 | 260.73273 | 47.91667 | 254.60256 |
| 48       | 263.97204 | 48       | 263.35752 | 48       | 250.61823 |

|          |           |          |           |          |           |
|----------|-----------|----------|-----------|----------|-----------|
| 48.08333 | 260.96339 | 48.08333 | 259.35716 | 48.08333 | 258.87229 |
| 48.16667 | 253.71865 | 48.16667 | 251.30578 | 48.16667 | 261.20411 |
| 48.25    | 254.43267 | 48.25    | 257.2752  | 48.25    | 264.0861  |
| 48.33333 | 261.85051 | 48.33333 | 256.29614 | 48.33333 | 261.15294 |
| 48.41667 | 263.98073 | 48.41667 | 269.16004 | 48.41667 | 253.20029 |
| 48.5     | 253.46652 | 48.5     | 258.06719 | 48.5     | 241.32421 |
| 48.58333 | 262.94106 | 48.58333 | 254.01842 | 48.58333 | 251.85047 |
| 48.66667 | 261.00269 | 48.66667 | 266.6701  | 48.66667 | 256.43383 |
| 48.75    | 256.42232 | 48.75    | 250.54256 | 48.75    | 248.42579 |
| 48.83333 | 254.95488 | 48.83333 | 253.05036 | 48.83333 | 258.2183  |
| 48.91667 | 257.11505 | 48.91667 | 257.81518 | 48.91667 | 263.78308 |
| 49       | 263.02658 | 49       | 259.48335 | 49       | 249.12931 |
| 49.08333 | 264.54079 | 49.08333 | 254.49062 | 49.08333 | 270.03636 |
| 49.16667 | 253.17688 | 49.16667 | 258.13079 | 49.16667 | 251.27223 |
| 49.25    | 253.55542 | 49.25    | 246.64071 | 49.25    | 241.93624 |
| 49.33333 | 262.59968 | 49.33333 | 255.99477 | 49.33333 | 269.10348 |
| 49.41667 | 260.78892 | 49.41667 | 264.92191 | 49.41667 | 252.40873 |

|          |           |          |           |          |           |
|----------|-----------|----------|-----------|----------|-----------|
| 49.5     | 252.94532 | 49.5     | 248.85368 | 49.5     | 249.16379 |
| 49.58333 | 263.92804 | 49.58333 | 269.63469 | 49.58333 | 268.43936 |
| 49.66667 | 254.40801 | 49.66667 | 256.7188  | 49.66667 | 252.171   |
| 49.75    | 264.71559 | 49.75    | 259.2463  | 49.75    | 255.66787 |
| 49.83333 | 260.78352 | 49.83333 | 250.5376  | 49.83333 | 260.77127 |
| 49.91667 | 260.88752 | 49.91667 | 267.76556 | 49.91667 | 270.70367 |
| 50       | 252.69617 | 50       | 244.10273 | 50       | 259.80173 |
| 50.08333 | 252.9007  | 50.08333 | 255.53213 | 50.08333 | 242.62029 |
| 50.16667 | 255.83345 | 50.16667 | 254.34962 | 50.16667 | 265.40956 |
| 50.25    | 255.60769 | 50.25    | 258.94899 | 50.25    | 244.03173 |
| 50.33333 | 259.20022 | 50.33333 | 261.36273 | 50.33333 | 255.31844 |
| 50.41667 | 258.35452 | 50.41667 | 259.70133 | 50.41667 | 250.54938 |
| 50.5     | 258.75546 | 50.5     | 257.2953  | 50.5     | 245.15812 |
| 50.58333 | 259.67474 | 50.58333 | 263.701   | 50.58333 | 267.66311 |
| 50.66667 | 257.30708 | 50.66667 | 248.6909  | 50.66667 | 264.84618 |
| 50.75    | 263.43744 | 50.75    | 256.98638 | 50.75    | 262.64502 |
| 50.83333 | 261.38834 | 50.83333 | 263.59053 | 50.83333 | 247.02688 |

|          |           |          |           |          |           |
|----------|-----------|----------|-----------|----------|-----------|
| 50.91667 | 253.47202 | 50.91667 | 248.76606 | 50.91667 | 246.43995 |
| 51       | 252.98265 | 51       | 253.16202 | 51       | 243.01665 |
| 51.08333 | 264.71194 | 51.08333 | 262.89284 | 51.08333 | 252.48172 |
| 51.16667 | 266.58482 | 51.16667 | 265.82905 | 51.16667 | 269.28719 |
| 51.25    | 254.93692 | 51.25    | 252.33274 | 51.25    | 257.22779 |
| 51.33333 | 252.74013 | 51.33333 | 255.82735 | 51.33333 | 250.5423  |
| 51.41667 | 263.44315 | 51.41667 | 259.00545 | 51.41667 | 266.97856 |
| 51.5     | 256.05819 | 51.5     | 258.41393 | 51.5     | 262.87088 |
| 51.58333 | 267.86199 | 51.58333 | 262.22725 | 51.58333 | 271.57376 |
| 51.66667 | 267.49921 | 51.66667 | 261.50669 | 51.66667 | 251.56937 |
| 51.75    | 255.34206 | 51.75    | 247.285   | 51.75    | 250.67466 |
| 51.83333 | 260.3925  | 51.83333 | 253.48715 | 51.83333 | 261.33304 |
| 51.91667 | 255.79828 | 51.91667 | 247.70712 | 51.91667 | 257.2929  |
| 52       | 261.93151 | 52       | 261.2793  | 52       | 250.50449 |
| 52.08333 | 255.07166 | 52.08333 | 258.47764 | 52.08333 | 241.69622 |
| 52.16667 | 265.96668 | 52.16667 | 258.77494 | 52.16667 | 270.11469 |
| 52.25    | 266.27124 | 52.25    | 259.6536  | 52.25    | 251.51715 |

|          |           |          |           |          |           |
|----------|-----------|----------|-----------|----------|-----------|
| 52.33333 | 259.88623 | 52.33333 | 258.29937 | 52.33333 | 248.76908 |
| 52.41667 | 265.03592 | 52.41667 | 267.87737 | 52.41667 | 250.77645 |
| 52.5     | 255.37255 | 52.5     | 262.61542 | 52.5     | 257.75057 |
| 52.58333 | 259.01147 | 52.58333 | 258.1632  | 52.58333 | 256.38535 |
| 52.66667 | 262.60897 | 52.66667 | 257.3069  | 52.66667 | 263.18619 |
| 52.75    | 255.299   | 52.75    | 246.88358 | 52.75    | 250.18281 |
| 52.83333 | 264.0912  | 52.83333 | 257.11603 | 52.83333 | 258.55321 |
| 52.91667 | 256.31915 | 52.91667 | 250.14801 | 52.91667 | 265.5533  |
| 53       | 253.60477 | 53       | 246.64611 | 53       | 251.83993 |
| 53.08333 | 264.53497 | 53.08333 | 254.21546 | 53.08333 | 249.79958 |
| 53.16667 | 256.48628 | 53.16667 | 255.8166  | 53.16667 | 252.73722 |
| 53.25    | 258.63736 | 53.25    | 253.25822 | 53.25    | 263.68079 |
| 53.33333 | 254.55912 | 53.33333 | 261.73794 | 53.33333 | 256.33416 |
| 53.41667 | 262.38366 | 53.41667 | 262.05175 | 53.41667 | 250.83773 |
| 53.5     | 261.54264 | 53.5     | 263.84918 | 53.5     | 250.3698  |
| 53.58333 | 262.52443 | 53.58333 | 254.34417 | 53.58333 | 271.0402  |
| 53.66667 | 261.57609 | 53.66667 | 267.01478 | 53.66667 | 256.1     |

|          |           |          |           |          |           |
|----------|-----------|----------|-----------|----------|-----------|
| 53.75    | 257.99354 | 53.75    | 256.53897 | 53.75    | 248.91449 |
| 53.83333 | 264.77149 | 53.83333 | 270.35552 | 53.83333 | 266.58782 |
| 53.91667 | 256.87411 | 53.91667 | 256.92138 | 53.91667 | 265.90401 |
| 54       | 261.76829 | 54       | 259.89874 | 54       | 271.56916 |
| 54.08333 | 252.91757 | 54.08333 | 250.59907 | 54.08333 | 246.48056 |
| 54.16667 | 268.10843 | 54.16667 | 260.84404 | 54.16667 | 270.08091 |
| 54.25    | 262.06436 | 54.25    | 252.52417 | 54.25    | 251.53016 |
| 54.33333 | 263.38634 | 54.33333 | 270.2012  | 54.33333 | 262.06045 |
| 54.41667 | 258.2904  | 54.41667 | 256.59628 | 54.41667 | 251.39224 |
| 54.5     | 267.67731 | 54.5     | 272.37451 | 54.5     | 269.55881 |
| 54.58333 | 261.93825 | 54.58333 | 258.80809 | 54.58333 | 265.81258 |
| 54.66667 | 254.94029 | 54.66667 | 246.0648  | 54.66667 | 244.89947 |
| 54.75    | 258.35574 | 54.75    | 259.40492 | 54.75    | 265.5419  |
| 54.83333 | 264.5656  | 54.83333 | 254.97589 | 54.83333 | 253.99647 |
| 54.91667 | 259.45168 | 54.91667 | 251.78332 | 54.91667 | 248.93351 |
| 55       | 265.96135 | 55       | 265.80151 | 55       | 268.49091 |
| 55.08333 | 266.78478 | 55.08333 | 261.78737 | 55.08333 | 257.62286 |

|          |           |          |           |          |           |
|----------|-----------|----------|-----------|----------|-----------|
| 55.16667 | 263.08109 | 55.16667 | 270.86145 | 55.16667 | 249.59213 |
| 55.25    | 268.16829 | 55.25    | 259.66521 | 55.25    | 252.90093 |
| 55.33333 | 264.91835 | 55.33333 | 268.49766 | 55.33333 | 268.16175 |
| 55.41667 | 264.04971 | 55.41667 | 264.69452 | 55.41667 | 252.36208 |
| 55.5     | 255.64098 | 55.5     | 259.56558 | 55.5     | 256.19215 |
| 55.58333 | 258.60763 | 55.58333 | 252.34881 | 55.58333 | 245.26399 |
| 55.66667 | 260.27162 | 55.66667 | 259.38149 | 55.66667 | 259.09259 |
| 55.75    | 266.90008 | 55.75    | 264.64104 | 55.75    | 263.98287 |
| 55.83333 | 256.66279 | 55.83333 | 254.35026 | 55.83333 | 250.19694 |
| 55.91667 | 252.97914 | 55.91667 | 258.09236 | 55.91667 | 257.80548 |
| 56       | 262.58957 | 56       | 270.28397 | 56       | 249.69669 |
| 56.08333 | 261.93869 | 56.08333 | 257.0606  | 56.08333 | 265.34677 |
| 56.16667 | 263.46046 | 56.16667 | 264.37519 | 56.16667 | 257.03914 |
| 56.25    | 256.43408 | 56.25    | 257.11979 | 56.25    | 260.37522 |
| 56.33333 | 266.00571 | 56.33333 | 269.14617 | 56.33333 | 262.28775 |
| 56.41667 | 258.49249 | 56.41667 | 265.29886 | 56.41667 | 257.95302 |
| 56.5     | 260.01218 | 56.5     | 253.39357 | 56.5     | 256.25838 |

|          |           |          |           |          |           |
|----------|-----------|----------|-----------|----------|-----------|
| 56.58333 | 264.83084 | 56.58333 | 258.14969 | 56.58333 | 263.44948 |
| 56.66667 | 257.79638 | 56.66667 | 259.40245 | 56.66667 | 248.20094 |
| 56.75    | 262.03912 | 56.75    | 254.43842 | 56.75    | 263.02203 |
| 56.83333 | 259.13587 | 56.83333 | 251.92334 | 56.83333 | 253.52195 |
| 56.91667 | 265.88234 | 56.91667 | 256.64426 | 56.91667 | 255.18084 |
| 57       | 267.57421 | 57       | 256.92128 | 57       | 260.02434 |
| 57.08333 | 257.01154 | 57.08333 | 254.83594 | 57.08333 | 263.86167 |
| 57.16667 | 259.6315  | 57.16667 | 260.03834 | 57.16667 | 259.81973 |
| 57.25    | 257.43961 | 57.25    | 252.3907  | 57.25    | 245.98329 |
| 57.33333 | 262.02098 | 57.33333 | 255.78567 | 57.33333 | 259.49326 |
| 57.41667 | 253.41972 | 57.41667 | 255.82391 | 57.41667 | 253.63437 |
| 57.5     | 258.43323 | 57.5     | 260.81314 | 57.5     | 257.27364 |
| 57.58333 | 268.19451 | 57.58333 | 265.99049 | 57.58333 | 260.02262 |
| 57.66667 | 252.89135 | 57.66667 | 254.94407 | 57.66667 | 256.80383 |
| 57.75    | 258.28125 | 57.75    | 264.65408 | 57.75    | 254.71258 |
| 57.83333 | 261.88843 | 57.83333 | 265.85552 | 57.83333 | 269.28914 |
| 57.91667 | 262.18934 | 57.91667 | 263.17359 | 57.91667 | 259.03048 |

|          |           |          |           |          |           |
|----------|-----------|----------|-----------|----------|-----------|
| 58       | 262.00627 | 58       | 263.65245 | 58       | 262.86617 |
| 58.08333 | 256.99076 | 58.08333 | 263.50728 | 58.08333 | 256.0106  |
| 58.16667 | 259.75946 | 58.16667 | 257.09952 | 58.16667 | 248.49369 |
| 58.25    | 256.25292 | 58.25    | 255.77091 | 58.25    | 244.22031 |
| 58.33333 | 267.60731 | 58.33333 | 269.03473 | 58.33333 | 272.52594 |
| 58.41667 | 260.24331 | 58.41667 | 266.38219 | 58.41667 | 260.8031  |
| 58.5     | 257.06524 | 58.5     | 261.65745 | 58.5     | 259.59502 |
| 58.58333 | 265.99743 | 58.58333 | 256.68725 | 58.58333 | 257.55254 |
| 58.66667 | 267.30926 | 58.66667 | 259.72168 | 58.66667 | 265.62922 |
| 58.75    | 258.00806 | 58.75    | 253.24342 | 58.75    | 249.60344 |
| 58.83333 | 256.2384  | 58.83333 | 259.42267 | 58.83333 | 250.85047 |
| 58.91667 | 262.79865 | 58.91667 | 262.75766 | 58.91667 | 268.04622 |
| 59       | 260.65911 | 59       | 255.49884 | 59       | 259.18899 |
| 59.08333 | 266.80443 | 59.08333 | 258.45478 | 59.08333 | 259.12846 |
| 59.16667 | 263.07178 | 59.16667 | 265.23081 | 59.16667 | 254.31149 |
| 59.25    | 266.52867 | 59.25    | 268.92237 | 59.25    | 254.72891 |
| 59.33333 | 259.99403 | 59.33333 | 266.75049 | 59.33333 | 244.98639 |

|          |           |          |           |          |           |
|----------|-----------|----------|-----------|----------|-----------|
| 59.41667 | 258.992   | 59.41667 | 257.70559 | 59.41667 | 265.19357 |
| 59.5     | 266.57466 | 59.5     | 265.12609 | 59.5     | 263.2694  |
| 59.58333 | 257.39534 | 59.58333 | 248.54892 | 59.58333 | 254.24663 |
| 59.66667 | 263.65788 | 59.66667 | 253.84717 | 59.66667 | 261.37592 |
| 59.75    | 262.30655 | 59.75    | 259.74696 | 59.75    | 256.92874 |
| 59.83333 | 258.49159 | 59.83333 | 253.98427 | 59.83333 | 250.48688 |
| 59.91667 | 255.00743 | 59.91667 | 249.27639 | 59.91667 | 250.51114 |
| 60       | 264.09489 | 60       | 255.21946 | 60       | 265.57884 |
| 60.08333 | 260.01814 | 60.08333 | 267.12548 | 60.08333 | 259.70144 |
| 60.16667 | 266.31403 | 60.16667 | 271.24536 | 60.16667 | 252.67103 |
| 60.25    | 265.61207 | 60.25    | 265.6822  | 60.25    | 267.55635 |
| 60.33333 | 253.92483 | 60.33333 | 260.6678  | 60.33333 | 241.56732 |
| 60.41667 | 255.9733  | 60.41667 | 263.64482 | 60.41667 | 260.74541 |
| 60.5     | 262.4945  | 60.5     | 264.34772 | 60.5     | 270.76886 |
| 60.58333 | 267.65548 | 60.58333 | 261.99884 | 60.58333 | 265.22275 |
| 60.66667 | 257.59337 | 60.66667 | 248.01502 | 60.66667 | 255.32242 |
| 60.75    | 265.99187 | 60.75    | 269.43354 | 60.75    | 270.69753 |

|          |           |          |           |          |           |
|----------|-----------|----------|-----------|----------|-----------|
| 60.83333 | 257.78439 | 60.83333 | 255.96314 | 60.83333 | 260.53701 |
| 60.91667 | 256.93526 | 60.91667 | 258.37564 | 60.91667 | 266.74967 |
| 61       | 255.78475 | 61       | 261.95556 | 61       | 250.04392 |
| 61.08333 | 253.43733 | 61.08333 | 246.51951 | 61.08333 | 251.10546 |
| 61.16667 | 260.94864 | 61.16667 | 261.20254 | 61.16667 | 265.12512 |
| 61.25    | 257.89557 | 61.25    | 259.03934 | 61.25    | 246.29259 |
| 61.33333 | 256.64582 | 61.33333 | 255.21399 | 61.33333 | 260.84069 |
| 61.41667 | 258.02876 | 61.41667 | 249.35564 | 61.41667 | 242.92763 |
| 61.5     | 256.34192 | 61.5     | 252.33196 | 61.5     | 262.27931 |
| 61.58333 | 255.90279 | 61.58333 | 251.6374  | 61.58333 | 253.0267  |
| 61.66667 | 255.13285 | 61.66667 | 256.89556 | 61.66667 | 247.55974 |
| 61.75    | 265.8072  | 61.75    | 271.13424 | 61.75    | 255.25412 |
| 61.83333 | 262.33605 | 61.83333 | 257.8989  | 61.83333 | 270.68358 |
| 61.91667 | 265.17874 | 61.91667 | 267.44787 | 61.91667 | 258.85979 |
| 62       | 256.5292  | 62       | 251.44351 | 62       | 247.98729 |
| 62.08333 | 257.34038 | 62.08333 | 264.07344 | 62.08333 | 262.92596 |
| 62.16667 | 252.68742 | 62.16667 | 256.97048 | 62.16667 | 241.51485 |

|          |           |          |           |          |           |
|----------|-----------|----------|-----------|----------|-----------|
| 62.25    | 257.1201  | 62.25    | 256.73622 | 62.25    | 242.83091 |
| 62.33333 | 256.0855  | 62.33333 | 253.99533 | 62.33333 | 255.18203 |
| 62.41667 | 258.82139 | 62.41667 | 254.16675 | 62.41667 | 260.96236 |
| 62.5     | 261.23689 | 62.5     | 256.69895 | 62.5     | 268.13381 |
| 62.58333 | 255.68188 | 62.58333 | 262.81872 | 62.58333 | 244.89133 |
| 62.66667 | 267.27731 | 62.66667 | 264.14803 | 62.66667 | 263.4483  |
| 62.75    | 261.69937 | 62.75    | 260.65833 | 62.75    | 267.13356 |
| 62.83333 | 253.45096 | 62.83333 | 260.84362 | 62.83333 | 255.31915 |
| 62.91667 | 256.35617 | 62.91667 | 257.90353 | 62.91667 | 245.95144 |
| 63       | 260.42    | 63       | 259.89448 | 63       | 258.55566 |
| 63.08333 | 253.93688 | 63.08333 | 251.12504 | 63.08333 | 256.12709 |
| 63.16667 | 266.23876 | 63.16667 | 259.08519 | 63.16667 | 274.84466 |
| 63.25    | 253.12712 | 63.25    | 249.41248 | 63.25    | 246.12284 |
| 63.33333 | 255.7919  | 63.33333 | 259.10466 | 63.33333 | 260.8333  |
| 63.41667 | 261.56712 | 63.41667 | 262.55558 | 63.41667 | 271.39105 |
| 63.5     | 260.52965 | 63.5     | 263.96838 | 63.5     | 249.39566 |
| 63.58333 | 266.89122 | 63.58333 | 260.0185  | 63.58333 | 263.32315 |

|          |           |          |           |          |           |
|----------|-----------|----------|-----------|----------|-----------|
| 63.66667 | 260.01814 | 63.66667 | 259.61381 | 63.66667 | 259.27605 |
| 63.75    | 266.71235 | 63.75    | 273.36335 | 63.75    | 273.87384 |
| 63.83333 | 268.09165 | 63.83333 | 265.58981 | 63.83333 | 267.22625 |
| 63.91667 | 260.03285 | 63.91667 | 262.34142 | 63.91667 | 264.52622 |
| 64       | 257.59476 | 64       | 249.48053 | 64       | 250.01349 |
| 64.08333 | 255.64404 | 64.08333 | 262.83275 | 64.08333 | 260.40516 |
| 64.16667 | 263.72532 | 64.16667 | 264.41655 | 64.16667 | 261.82149 |
| 64.25    | 259.83712 | 64.25    | 253.79617 | 64.25    | 256.59877 |
| 64.33333 | 261.75875 | 64.33333 | 254.19026 | 64.33333 | 257.2599  |
| 64.41667 | 258.42851 | 64.41667 | 258.05611 | 64.41667 | 244.13224 |
| 64.5     | 259.21625 | 64.5     | 258.86838 | 64.5     | 263.24162 |
| 64.58333 | 259.07641 | 64.58333 | 250.40382 | 64.58333 | 258.04554 |
| 64.66667 | 257.66332 | 64.66667 | 265.25357 | 64.66667 | 258.3469  |
| 64.75    | 262.33436 | 64.75    | 268.60546 | 64.75    | 253.58918 |
| 64.83333 | 255.34665 | 64.83333 | 253.38074 | 64.83333 | 256.61649 |
| 64.91667 | 267.70691 | 64.91667 | 259.19999 | 64.91667 | 254.85912 |
| 65       | 253.67494 | 65       | 258.30451 | 65       | 251.25463 |

|          |           |          |           |          |           |
|----------|-----------|----------|-----------|----------|-----------|
| 65.08333 | 258.23996 | 65.08333 | 256.91932 | 65.08333 | 252.18165 |
| 65.16667 | 266.38013 | 65.16667 | 269.08708 | 65.16667 | 257.55655 |
| 65.25    | 265.94412 | 65.25    | 264.77955 | 65.25    | 254.0878  |
| 65.33333 | 265.68419 | 65.33333 | 260.14202 | 65.33333 | 263.57758 |
| 65.41667 | 266.58472 | 65.41667 | 271.49815 | 65.41667 | 257.40328 |
| 65.5     | 261.11512 | 65.5     | 268.58745 | 65.5     | 265.6781  |
| 65.58333 | 259.33917 | 65.58333 | 253.39019 | 65.58333 | 260.2326  |
| 65.66667 | 255.80366 | 65.66667 | 255.44272 | 65.66667 | 257.51089 |
| 65.75    | 255.89929 | 65.75    | 252.53447 | 65.75    | 258.85135 |
| 65.83333 | 253.1632  | 65.83333 | 259.37355 | 65.83333 | 245.30299 |
| 65.91667 | 265.72379 | 65.91667 | 264.5485  | 65.91667 | 261.95291 |
| 66       | 258.86059 | 66       | 264.43981 | 66       | 267.82959 |
| 66.08333 | 255.32403 | 66.08333 | 260.55357 | 66.08333 | 265.09962 |
| 66.16667 | 267.36262 | 66.16667 | 261.8381  | 66.16667 | 257.52795 |
| 66.25    | 257.47388 | 66.25    | 261.41323 | 66.25    | 253.39112 |
| 66.33333 | 267.2473  | 66.33333 | 264.31987 | 66.33333 | 276.68754 |
| 66.41667 | 267.35908 | 66.41667 | 274.1492  | 66.41667 | 277.43932 |

|          |           |          |           |          |           |
|----------|-----------|----------|-----------|----------|-----------|
| 66.5     | 258.2333  | 66.5     | 257.0821  | 66.5     | 243.00064 |
| 66.58333 | 257.19635 | 66.58333 | 261.68134 | 66.58333 | 265.18692 |
| 66.66667 | 265.22036 | 66.66667 | 259.86264 | 66.66667 | 268.87271 |
| 66.75    | 262.1597  | 66.75    | 257.15219 | 66.75    | 265.75312 |
| 66.83333 | 262.85132 | 66.83333 | 263.13678 | 66.83333 | 263.90562 |
| 66.91667 | 255.24624 | 66.91667 | 262.88398 | 66.91667 | 242.02806 |
| 67       | 264.28224 | 67       | 262.76922 | 67       | 269.87815 |
| 67.08333 | 255.90638 | 67.08333 | 248.33207 | 67.08333 | 246.22596 |
| 67.16667 | 257.58316 | 67.16667 | 256.99098 | 67.16667 | 267.4115  |
| 67.25    | 266.45375 | 67.25    | 262.23286 | 67.25    | 256.18436 |
| 67.33333 | 257.01381 | 67.33333 | 256.66273 | 67.33333 | 255.82846 |
| 67.41667 | 258.81849 | 67.41667 | 258.3112  | 67.41667 | 252.96013 |
| 67.5     | 267.67033 | 67.5     | 265.49524 | 67.5     | 251.95647 |
| 67.58333 | 257.46273 | 67.58333 | 252.96331 | 67.58333 | 244.11895 |
| 67.66667 | 260.22287 | 67.66667 | 253.25046 | 67.66667 | 268.94918 |
| 67.75    | 256.23487 | 67.75    | 258.49615 | 67.75    | 247.24949 |
| 67.83333 | 264.61081 | 67.83333 | 264.61769 | 67.83333 | 252.17437 |

|          |           |          |           |          |           |
|----------|-----------|----------|-----------|----------|-----------|
| 67.91667 | 255.36727 | 67.91667 | 249.32758 | 67.91667 | 242.98553 |
| 68       | 253.08806 | 68       | 256.70418 | 68       | 261.20788 |
| 68.08333 | 263.80836 | 68.08333 | 254.06196 | 68.08333 | 248.15055 |
| 68.16667 | 262.4906  | 68.16667 | 265.67435 | 68.16667 | 256.60688 |
| 68.25    | 261.39347 | 68.25    | 263.84169 | 68.25    | 247.69201 |
| 68.33333 | 253.22234 | 68.33333 | 257.47622 | 68.33333 | 262.44191 |
| 68.41667 | 255.95513 | 68.41667 | 252.63437 | 68.41667 | 258.63575 |
| 68.5     | 258.52173 | 68.5     | 260.19126 | 68.5     | 251.12568 |
| 68.58333 | 258.13234 | 68.58333 | 262.63726 | 68.58333 | 259.8151  |
| 68.66667 | 263.104   | 68.66667 | 270.64377 | 68.66667 | 254.9633  |
| 68.75    | 263.89435 | 68.75    | 262.48858 | 68.75    | 260.88833 |
| 68.83333 | 259.68102 | 68.83333 | 249.96662 | 68.83333 | 249.15122 |
| 68.91667 | 264.26144 | 68.91667 | 262.98241 | 68.91667 | 249.851   |
| 69       | 266.00985 | 69       | 266.35913 | 69       | 261.39352 |
| 69.08333 | 256.27241 | 69.08333 | 261.62312 | 69.08333 | 260.5519  |
| 69.16667 | 253.00152 | 69.16667 | 258.36338 | 69.16667 | 248.68431 |
| 69.25    | 257.13833 | 69.25    | 254.77806 | 69.25    | 264.71697 |

|          |           |          |           |          |           |
|----------|-----------|----------|-----------|----------|-----------|
| 69.33333 | 267.41505 | 69.33333 | 266.56387 | 69.33333 | 261.08293 |
| 69.41667 | 255.84743 | 69.41667 | 253.79681 | 69.41667 | 261.54439 |
| 69.5     | 266.23512 | 69.5     | 269.04949 | 69.5     | 258.0199  |
| 69.58333 | 254.83681 | 69.58333 | 251.9569  | 69.58333 | 252.60419 |
| 69.66667 | 268.05104 | 69.66667 | 269.61512 | 69.66667 | 252.01328 |
| 69.75    | 256.16874 | 69.75    | 248.6899  | 69.75    | 246.01191 |
| 69.83333 | 257.72075 | 69.83333 | 255.88166 | 69.83333 | 256.64245 |
| 69.91667 | 262.5179  | 69.91667 | 269.82744 | 69.91667 | 271.0093  |
| 70       | 262.19467 | 70       | 257.92063 | 70       | 247.14023 |
| 70.08333 | 266.2984  | 70.08333 | 268.55901 | 70.08333 | 275.14909 |
| 70.16667 | 262.40104 | 70.16667 | 263.84136 | 70.16667 | 260.76602 |
| 70.25    | 255.86573 | 70.25    | 260.88684 | 70.25    | 258.55949 |
| 70.33333 | 257.49745 | 70.33333 | 262.56088 | 70.33333 | 242.97665 |
| 70.41667 | 253.67328 | 70.41667 | 258.78581 | 70.41667 | 263.50211 |
| 70.5     | 262.05212 | 70.5     | 258.54088 | 70.5     | 258.53381 |
| 70.58333 | 253.15472 | 70.58333 | 248.63996 | 70.58333 | 260.59215 |
| 70.66667 | 253.93308 | 70.66667 | 256.55113 | 70.66667 | 241.73363 |

|          |           |          |           |          |           |
|----------|-----------|----------|-----------|----------|-----------|
| 70.75    | 257.51767 | 70.75    | 260.90609 | 70.75    | 254.0762  |
| 70.83333 | 265.77278 | 70.83333 | 271.37181 | 70.83333 | 256.07579 |
| 70.91667 | 254.31661 | 70.91667 | 244.78305 | 70.91667 | 251.58983 |
| 71       | 264.11276 | 71       | 254.81309 | 71       | 264.33039 |
| 71.08333 | 256.17212 | 71.08333 | 257.24318 | 71.08333 | 254.50649 |
| 71.16667 | 263.06723 | 71.16667 | 269.50317 | 71.16667 | 273.38526 |
| 71.25    | 265.44134 | 71.25    | 273.3568  | 71.25    | 272.31203 |
| 71.33333 | 261.52808 | 71.33333 | 264.73808 | 71.33333 | 251.13836 |
| 71.41667 | 255.16599 | 71.41667 | 252.71078 | 71.41667 | 262.58877 |
| 71.5     | 255.3072  | 71.5     | 246.85424 | 71.5     | 258.18554 |
| 71.58333 | 265.3503  | 71.58333 | 266.50776 | 71.58333 | 270.74487 |
| 71.66667 | 266.00728 | 71.66667 | 271.61498 | 71.66667 | 265.87135 |
| 71.75    | 254.59226 | 71.75    | 252.31544 | 71.75    | 258.28945 |
| 71.83333 | 257.30109 | 71.83333 | 259.50874 | 71.83333 | 256.63674 |
| 71.91667 | 254.9333  | 71.91667 | 260.85795 | 71.91667 | 242.15196 |
| 72       | 264.63621 | 72       | 254.90262 | 72       | 267.58902 |
| 72.08333 | 257.86749 | 72.08333 | 261.92374 | 72.08333 | 251.87026 |

|          |           |          |           |          |           |
|----------|-----------|----------|-----------|----------|-----------|
| 72.16667 | 265.57975 | 72.16667 | 260.41051 | 72.16667 | 254.35157 |
| 72.25    | 262.29661 | 72.25    | 258.68714 | 72.25    | 254.63151 |
| 72.33333 | 254.89594 | 72.33333 | 247.29749 | 72.33333 | 259.59699 |
| 72.41667 | 254.27836 | 72.41667 | 253.5618  | 72.41667 | 251.1459  |
| 72.5     | 256.93692 | 72.5     | 256.838   | 72.5     | 256.17998 |
| 72.58333 | 256.69756 | 72.58333 | 260.67021 | 72.58333 | 258.45748 |
| 72.66667 | 263.61327 | 72.66667 | 256.20547 | 72.66667 | 265.89958 |
| 72.75    | 266.01681 | 72.75    | 256.84668 | 72.75    | 271.43664 |
| 72.83333 | 262.60759 | 72.83333 | 268.11158 | 72.83333 | 255.09517 |
| 72.91667 | 264.26041 | 72.91667 | 265.15361 | 72.91667 | 266.9186  |
| 73       | 254.02329 | 73       | 248.14468 | 73       | 255.51746 |
| 73.08333 | 263.63478 | 73.08333 | 269.93512 | 73.08333 | 265.90125 |
| 73.16667 | 254.03012 | 73.16667 | 246.41379 | 73.16667 | 239.92332 |
| 73.25    | 262.36705 | 73.25    | 260.34158 | 73.25    | 271.78498 |
| 73.33333 | 262.67967 | 73.33333 | 256.8424  | 73.33333 | 263.22157 |
| 73.41667 | 261.64061 | 73.41667 | 255.85129 | 73.41667 | 247.64153 |
| 73.5     | 263.60993 | 73.5     | 253.23899 | 73.5     | 264.02643 |

|          |           |          |           |          |           |
|----------|-----------|----------|-----------|----------|-----------|
| 73.58333 | 260.91756 | 73.58333 | 265.17678 | 73.58333 | 257.66522 |
| 73.66667 | 255.1978  | 73.66667 | 261.08905 | 73.66667 | 262.45155 |
| 73.75    | 258.65528 | 73.75    | 260.57787 | 73.75    | 258.76237 |
| 73.83333 | 255.8384  | 73.83333 | 248.43393 | 73.83333 | 262.13612 |
| 73.91667 | 257.10414 | 73.91667 | 254.76989 | 73.91667 | 263.24353 |
| 74       | 262.06125 | 74       | 257.91806 | 74       | 256.50031 |
| 74.08333 | 262.47702 | 74.08333 | 262.77362 | 74.08333 | 259.84595 |
| 74.16667 | 260.18059 | 74.16667 | 261.4102  | 74.16667 | 252.89397 |
| 74.25    | 260.44137 | 74.25    | 257.75934 | 74.25    | 264.77068 |
| 74.33333 | 259.67217 | 74.33333 | 253.83137 | 74.33333 | 245.64962 |
| 74.41667 | 267.28418 | 74.41667 | 272.40828 | 74.41667 | 275.34199 |
| 74.5     | 261.81188 | 74.5     | 254.99037 | 74.5     | 271.46331 |
| 74.58333 | 267.03886 | 74.58333 | 263.54839 | 74.58333 | 275.4869  |
| 74.66667 | 268.16029 | 74.66667 | 266.5044  | 74.66667 | 255.78174 |
| 74.75    | 261.09172 | 74.75    | 254.98322 | 74.75    | 260.23978 |
| 74.83333 | 260.81303 | 74.83333 | 260.82215 | 74.83333 | 247.51234 |
| 74.91667 | 258.00838 | 74.91667 | 258.06953 | 74.91667 | 264.82986 |

|          |           |          |           |          |           |
|----------|-----------|----------|-----------|----------|-----------|
| 75       | 256.25064 | 75       | 263.80696 | 75       | 248.93852 |
| 75.08333 | 259.89489 | 75.08333 | 254.87008 | 75.08333 | 266.78445 |
| 75.16667 | 263.50398 | 75.16667 | 271.00225 | 75.16667 | 248.01785 |
| 75.25    | 258.15932 | 75.25    | 259.72789 | 75.25    | 261.85151 |
| 75.33333 | 258.09474 | 75.33333 | 252.72999 | 75.33333 | 252.4897  |
| 75.41667 | 252.7407  | 75.41667 | 252.64339 | 75.41667 | 250.98693 |
| 75.5     | 254.32892 | 75.5     | 256.36508 | 75.5     | 262.7673  |
| 75.58333 | 267.75608 | 75.58333 | 271.00315 | 75.58333 | 265.84617 |
| 75.66667 | 254.78145 | 75.66667 | 245.46485 | 75.66667 | 245.43505 |
| 75.75    | 258.60883 | 75.75    | 259.2419  | 75.75    | 265.60394 |
| 75.83333 | 266.78845 | 75.83333 | 265.39341 | 75.83333 | 263.64408 |
| 75.91667 | 258.11109 | 75.91667 | 264.12276 | 75.91667 | 261.80853 |
| 76       | 262.02235 | 76       | 256.79081 | 76       | 258.8828  |
| 76.08333 | 265.35194 | 76.08333 | 269.57635 | 76.08333 | 258.25511 |
| 76.16667 | 261.40427 | 76.16667 | 262.05647 | 76.16667 | 249.17055 |
| 76.25    | 260.12712 | 76.25    | 256.13729 | 76.25    | 269.0742  |
| 76.33333 | 261.36525 | 76.33333 | 262.55786 | 76.33333 | 257.32716 |

|          |           |          |           |          |           |
|----------|-----------|----------|-----------|----------|-----------|
| 76.41667 | 256.22089 | 76.41667 | 257.10793 | 76.41667 | 246.58186 |
| 76.5     | 253.51809 | 76.5     | 255.40528 | 76.5     | 242.15744 |
| 76.58333 | 265.08511 | 76.58333 | 267.85923 | 76.58333 | 255.11473 |
| 76.66667 | 261.83737 | 76.66667 | 263.44584 | 76.66667 | 255.95231 |
| 76.75    | 261.34898 | 76.75    | 266.23203 | 76.75    | 256.41759 |
| 76.83333 | 267.30456 | 76.83333 | 268.36763 | 76.83333 | 275.70781 |
| 76.91667 | 263.42148 | 76.91667 | 269.54287 | 76.91667 | 258.50472 |
| 77       | 268.21659 | 77       | 269.62312 | 77       | 277.12969 |
| 77.08333 | 256.3649  | 77.08333 | 251.6542  | 77.08333 | 261.41093 |
| 77.16667 | 264.77715 | 77.16667 | 262.35656 | 77.16667 | 264.08052 |
| 77.25    | 261.18634 | 77.25    | 261.33522 | 77.25    | 264.1239  |
| 77.33333 | 267.38574 | 77.33333 | 270.39784 | 77.33333 | 277.06163 |
| 77.41667 | 254.64708 | 77.41667 | 246.06777 | 77.41667 | 256.56789 |
| 77.5     | 253.15295 | 77.5     | 248.25646 | 77.5     | 255.66979 |
| 77.58333 | 267.32357 | 77.58333 | 270.61806 | 77.58333 | 254.85453 |
| 77.66667 | 260.76917 | 77.66667 | 253.54456 | 77.66667 | 271.04244 |
| 77.75    | 256.07597 | 77.75    | 248.20189 | 77.75    | 254.38689 |

|          |           |          |           |          |           |
|----------|-----------|----------|-----------|----------|-----------|
| 77.83333 | 254.03194 | 77.83333 | 253.46266 | 77.83333 | 253.98012 |
| 77.91667 | 264.58255 | 77.91667 | 271.99192 | 77.91667 | 265.34905 |
| 78       | 263.94568 | 78       | 263.19608 | 78       | 270.31153 |
| 78.08333 | 259.24909 | 78.08333 | 265.45655 | 78.08333 | 255.06818 |
| 78.16667 | 256.30976 | 78.16667 | 260.95743 | 78.16667 | 244.00587 |
| 78.25    | 261.14915 | 78.25    | 255.40074 | 78.25    | 247.197   |
| 78.33333 | 266.22976 | 78.33333 | 270.94948 | 78.33333 | 253.84262 |
| 78.41667 | 265.57231 | 78.41667 | 263.90691 | 78.41667 | 266.94187 |
| 78.5     | 262.07293 | 78.5     | 266.38508 | 78.5     | 251.00008 |
| 78.58333 | 261.12061 | 78.58333 | 264.32168 | 78.58333 | 270.6925  |
| 78.66667 | 253.75113 | 78.66667 | 249.61753 | 78.66667 | 262.90114 |
| 78.75    | 266.84126 | 78.75    | 258.31889 | 78.75    | 275.23929 |
| 78.83333 | 256.61839 | 78.83333 | 263.6505  | 78.83333 | 242.37273 |
| 78.91667 | 257.60697 | 78.91667 | 249.84089 | 78.91667 | 264.78622 |
| 79       | 261.48047 | 79       | 268.71172 | 79       | 262.49083 |
| 79.08333 | 254.8065  | 79.08333 | 259.95614 | 79.08333 | 246.54822 |
| 79.16667 | 257.90843 | 79.16667 | 260.66677 | 79.16667 | 253.43811 |

|          |           |          |           |          |           |
|----------|-----------|----------|-----------|----------|-----------|
| 79.25    | 258.57401 | 79.25    | 265.96819 | 79.25    | 250.45427 |
| 79.33333 | 258.86865 | 79.33333 | 266.04164 | 79.33333 | 244.61068 |
| 79.41667 | 267.98711 | 79.41667 | 272.36093 | 79.41667 | 268.48074 |
| 79.5     | 264.64896 | 79.5     | 260.83908 | 79.5     | 266.47107 |
| 79.58333 | 259.77132 | 79.58333 | 263.75829 | 79.58333 | 270.09464 |
| 79.66667 | 256.67647 | 79.66667 | 246.65942 | 79.66667 | 262.01868 |
| 79.75    | 260.83652 | 79.75    | 260.20007 | 79.75    | 249.60594 |
| 79.83333 | 264.69622 | 79.83333 | 262.53497 | 79.83333 | 256.25876 |
| 79.91667 | 266.94791 | 79.91667 | 268.84271 | 79.91667 | 272.49055 |
| 80       | 256.87663 | 80       | 258.69121 | 80       | 251.35558 |
| 80.08333 | 253.62366 | 80.08333 | 253.85674 | 80.08333 | 240.1078  |
| 80.16667 | 253.86802 | 80.16667 | 258.32823 | 80.16667 | 239.25259 |
| 80.25    | 263.82527 | 80.25    | 270.63723 | 80.25    | 265.82823 |
| 80.33333 | 254.74488 | 80.33333 | 246.48707 | 80.33333 | 244.61928 |
| 80.41667 | 261.6906  | 80.41667 | 255.50633 | 80.41667 | 260.11025 |
| 80.5     | 258.28368 | 80.5     | 248.40485 | 80.5     | 246.80194 |
| 80.58333 | 252.8439  | 80.58333 | 258.38017 | 80.58333 | 259.8229  |

|          |           |          |           |          |           |
|----------|-----------|----------|-----------|----------|-----------|
| 80.66667 | 259.12928 | 80.66667 | 258.94763 | 80.66667 | 257.70822 |
| 80.75    | 267.65801 | 80.75    | 274.1     | 80.75    | 273.87436 |
| 80.83333 | 263.97809 | 80.83333 | 257.50957 | 80.83333 | 249.26131 |
| 80.91667 | 262.16927 | 80.91667 | 252.8426  | 80.91667 | 246.57466 |
| 81       | 262.08177 | 81       | 266.71276 | 81       | 251.92453 |
| 81.08333 | 264.92453 | 81.08333 | 271.19185 | 81.08333 | 250.81412 |
| 81.16667 | 256.79153 | 81.16667 | 251.95178 | 81.16667 | 265.63569 |
| 81.25    | 255.15125 | 81.25    | 252.23768 | 81.25    | 246.51974 |
| 81.33333 | 262.34627 | 81.33333 | 254.41922 | 81.33333 | 267.99249 |
| 81.41667 | 263.60967 | 81.41667 | 270.52626 | 81.41667 | 270.371   |
| 81.5     | 261.02277 | 81.5     | 256.14321 | 81.5     | 246.98888 |
| 81.58333 | 259.91024 | 81.58333 | 258.47658 | 81.58333 | 265.94198 |
| 81.66667 | 257.32985 | 81.66667 | 248.78727 | 81.66667 | 247.12852 |
| 81.75    | 266.38972 | 81.75    | 272.27907 | 81.75    | 265.40621 |
| 81.83333 | 266.2991  | 81.83333 | 258.17591 | 81.83333 | 253.31861 |
| 81.91667 | 255.6719  | 81.91667 | 253.56389 | 81.91667 | 249.32792 |
| 82       | 257.18538 | 82       | 258.9687  | 82       | 250.64206 |

|          |           |          |           |          |           |
|----------|-----------|----------|-----------|----------|-----------|
| 82.08333 | 259.09036 | 82.08333 | 262.20463 | 82.08333 | 254.85735 |
| 82.16667 | 261.43975 | 82.16667 | 268.29418 | 82.16667 | 256.41488 |
| 82.25    | 264.05275 | 82.25    | 261.23769 | 82.25    | 273.34556 |
| 82.33333 | 257.72755 | 82.33333 | 260.80971 | 82.33333 | 246.99036 |
| 82.41667 | 255.11434 | 82.41667 | 247.66933 | 82.41667 | 245.41183 |
| 82.5     | 259.97537 | 82.5     | 257.12656 | 82.5     | 254.30583 |
| 82.58333 | 256.43377 | 82.58333 | 247.95401 | 82.58333 | 264.87377 |
| 82.66667 | 264.10497 | 82.66667 | 262.58742 | 82.66667 | 256.58564 |
| 82.75    | 258.5279  | 82.75    | 255.5724  | 82.75    | 268.04819 |
| 82.83333 | 257.90352 | 82.83333 | 264.76556 | 82.83333 | 243.98885 |
| 82.91667 | 265.07198 | 82.91667 | 255.07612 | 82.91667 | 274.31213 |
| 83       | 261.57597 | 83       | 257.89742 | 83       | 247.05536 |
| 83.08333 | 260.01565 | 83.08333 | 257.68513 | 83.08333 | 246.53696 |
| 83.16667 | 264.20358 | 83.16667 | 271.21528 | 83.16667 | 267.86042 |
| 83.25    | 266.34249 | 83.25    | 271.63791 | 83.25    | 276.56498 |
| 83.33333 | 254.04397 | 83.33333 | 245.64909 | 83.33333 | 256.56053 |
| 83.41667 | 264.16744 | 83.41667 | 266.28025 | 83.41667 | 273.01943 |

|          |           |          |           |          |           |
|----------|-----------|----------|-----------|----------|-----------|
| 83.5     | 262.27995 | 83.5     | 261.78503 | 83.5     | 269.95479 |
| 83.58333 | 256.10635 | 83.58333 | 263.39232 | 83.58333 | 259.46467 |
| 83.66667 | 261.8145  | 83.66667 | 257.9153  | 83.66667 | 271.48855 |
| 83.75    | 265.56611 | 83.75    | 262.3448  | 83.75    | 265.01081 |
| 83.83333 | 264.14334 | 83.83333 | 257.08727 | 83.83333 | 251.86278 |
| 83.91667 | 254.28743 | 83.91667 | 246.29035 | 83.91667 | 247.07559 |
| 84       | 257.7538  | 84       | 262.74443 | 84       | 259.12119 |
| 84.08333 | 254.03324 | 84.08333 | 251.95779 | 84.08333 | 252.97112 |
| 84.16667 | 254.26301 | 84.16667 | 255.88877 | 84.16667 | 239.43668 |
| 84.25    | 253.07363 | 84.25    | 254.3185  | 84.25    | 254.74139 |
| 84.33333 | 263.0864  | 84.33333 | 263.55996 | 84.33333 | 258.26535 |
| 84.41667 | 261.33358 | 84.41667 | 251.27093 | 84.41667 | 252.90139 |
| 84.5     | 262.2297  | 84.5     | 266.18307 | 84.5     | 269.9993  |
| 84.58333 | 253.72052 | 84.58333 | 247.89764 | 84.58333 | 252.14974 |
| 84.66667 | 261.29067 | 84.66667 | 253.14232 | 84.66667 | 271.11233 |
| 84.75    | 266.98398 | 84.75    | 266.85583 | 84.75    | 272.7204  |
| 84.83333 | 263.86385 | 84.83333 | 254.57663 | 84.83333 | 264.97392 |

|          |           |          |           |          |           |
|----------|-----------|----------|-----------|----------|-----------|
| 84.91667 | 262.34312 | 84.91667 | 265.90076 | 84.91667 | 252.60259 |
| 85       | 266.64828 | 85       | 259.84902 | 85       | 263.0344  |
| 85.08333 | 266.56859 | 85.08333 | 259.93557 | 85.08333 | 265.13605 |
| 85.16667 | 257.97371 | 85.16667 | 263.35995 | 85.16667 | 266.91044 |
| 85.25    | 262.75479 | 85.25    | 258.2877  | 85.25    | 247.40991 |
| 85.33333 | 257.1704  | 85.33333 | 249.5399  | 85.33333 | 263.37772 |
| 85.41667 | 255.28056 | 85.41667 | 261.16146 | 85.41667 | 261.23345 |
| 85.5     | 256.19647 | 85.5     | 245.99934 | 85.5     | 242.31575 |
| 85.58333 | 253.59497 | 85.58333 | 258.68918 | 85.58333 | 258.97017 |
| 85.66667 | 263.31366 | 85.66667 | 255.44795 | 85.66667 | 251.75392 |
| 85.75    | 266.17622 | 85.75    | 257.9511  | 85.75    | 251.79844 |
| 85.83333 | 258.18437 | 85.83333 | 252.38709 | 85.83333 | 246.88183 |
| 85.91667 | 266.89652 | 85.91667 | 259.4808  | 85.91667 | 257.64055 |
| 86       | 264.10173 | 86       | 265.7587  | 86       | 265.4122  |
| 86.08333 | 254.19917 | 86.08333 | 244.49004 | 86.08333 | 261.62027 |
| 86.16667 | 267.47826 | 86.16667 | 257.05731 | 86.16667 | 270.28652 |
| 86.25    | 254.79366 | 86.25    | 258.69175 | 86.25    | 263.89285 |

|          |           |          |           |          |           |
|----------|-----------|----------|-----------|----------|-----------|
| 86.33333 | 259.48331 | 86.33333 | 253.42567 | 86.33333 | 250.6357  |
| 86.41667 | 264.03437 | 86.41667 | 259.45707 | 86.41667 | 264.27121 |
| 86.5     | 254.79268 | 86.5     | 247.70868 | 86.5     | 244.94112 |
| 86.58333 | 263.72548 | 86.58333 | 254.1438  | 86.58333 | 263.6308  |
| 86.66667 | 252.6843  | 86.66667 | 255.6963  | 86.66667 | 240.08976 |
| 86.75    | 262.40639 | 86.75    | 261.57351 | 86.75    | 263.44395 |
| 86.83333 | 267.43129 | 86.83333 | 270.69315 | 86.83333 | 274.93381 |
| 86.91667 | 258.43368 | 86.91667 | 256.71173 | 86.91667 | 260.23625 |
| 87       | 260.87476 | 87       | 264.64727 | 87       | 245.86325 |
| 87.08333 | 265.48809 | 87.08333 | 264.40676 | 87.08333 | 273.61628 |
| 87.16667 | 258.70231 | 87.16667 | 250.32915 | 87.16667 | 252.71387 |
| 87.25    | 263.25312 | 87.25    | 262.00767 | 87.25    | 254.30462 |
| 87.33333 | 255.9203  | 87.33333 | 262.62004 | 87.33333 | 260.6085  |
| 87.41667 | 254.77598 | 87.41667 | 245.35844 | 87.41667 | 239.99031 |
| 87.5     | 261.2263  | 87.5     | 265.09924 | 87.5     | 248.75326 |
| 87.58333 | 266.79042 | 87.58333 | 272.31005 | 87.58333 | 276.96607 |
| 87.66667 | 264.0795  | 87.66667 | 263.15575 | 87.66667 | 249.54695 |

|          |           |          |           |          |           |
|----------|-----------|----------|-----------|----------|-----------|
| 87.75    | 253.96203 | 87.75    | 251.94633 | 87.75    | 256.10877 |
| 87.83333 | 264.47576 | 87.83333 | 271.74408 | 87.83333 | 254.39526 |
| 87.91667 | 262.16521 | 87.91667 | 252.79491 | 87.91667 | 249.25856 |
| 88       | 255.88165 | 88       | 254.22584 | 88       | 254.53111 |
| 88.08333 | 267.00025 | 88.08333 | 263.82641 | 88.08333 | 267.43439 |
| 88.16667 | 254.49509 | 88.16667 | 256.53793 | 88.16667 | 249.19803 |
| 88.25    | 256.55066 | 88.25    | 255.09319 | 88.25    | 254.05006 |
| 88.33333 | 266.42176 | 88.33333 | 272.73036 | 88.33333 | 263.19885 |
| 88.41667 | 257.2707  | 88.41667 | 248.30327 | 88.41667 | 261.6708  |
| 88.5     | 263.02941 | 88.5     | 253.99567 | 88.5     | 263.88899 |
| 88.58333 | 256.54032 | 88.58333 | 257.20245 | 88.58333 | 250.58474 |
| 88.66667 | 264.39001 | 88.66667 | 255.03007 | 88.66667 | 273.30735 |
| 88.75    | 256.7636  | 88.75    | 251.43601 | 88.75    | 250.19122 |
| 88.83333 | 267.78035 | 88.83333 | 268.93582 | 88.83333 | 266.75556 |
| 88.91667 | 256.53571 | 88.91667 | 256.12141 | 88.91667 | 261.14258 |
| 89       | 266.24974 | 89       | 261.6604  | 89       | 266.04979 |
| 89.08333 | 254.75841 | 89.08333 | 262.30538 | 89.08333 | 241.4427  |

|          |           |          |           |          |           |
|----------|-----------|----------|-----------|----------|-----------|
| 89.16667 | 257.13907 | 89.16667 | 256.4034  | 89.16667 | 252.38766 |
| 89.25    | 266.62674 | 89.25    | 264.42973 | 89.25    | 250.82004 |
| 89.33333 | 257.3139  | 89.33333 | 257.92631 | 89.33333 | 262.88012 |
| 89.41667 | 265.42383 | 89.41667 | 256.64944 | 89.41667 | 259.92557 |
| 89.5     | 252.92856 | 89.5     | 255.23653 | 89.5     | 243.35976 |
| 89.58333 | 261.87153 | 89.58333 | 267.02909 | 89.58333 | 257.93534 |
| 89.66667 | 254.20162 | 89.66667 | 255.616   | 89.66667 | 239.25177 |
| 89.75    | 253.45715 | 89.75    | 256.96171 | 89.75    | 248.82548 |
| 89.83333 | 262.3733  | 89.83333 | 265.11747 | 89.83333 | 256.6268  |
| 89.91667 | 264.7313  | 89.91667 | 258.12678 | 89.91667 | 252.66511 |
| 90       | 257.83895 | 90       | 255.67543 | 90       | 257.92301 |
| 90.08333 | 265.94263 | 90.08333 | 259.55868 | 90.08333 | 261.55085 |
| 90.16667 | 253.89514 | 90.16667 | 249.763   | 90.16667 | 253.70091 |
| 90.25    | 267.58846 | 90.25    | 265.37952 | 90.25    | 258.79176 |
| 90.33333 | 259.14097 | 90.33333 | 256.32126 | 90.33333 | 261.59271 |
| 90.41667 | 253.81653 | 90.41667 | 245.35327 | 90.41667 | 252.19261 |
| 90.5     | 254.55947 | 90.5     | 251.98155 | 90.5     | 251.67302 |

|          |           |          |           |          |           |
|----------|-----------|----------|-----------|----------|-----------|
| 90.58333 | 268.2304  | 90.58333 | 269.98945 | 90.58333 | 259.11968 |
| 90.66667 | 267.72428 | 90.66667 | 264.02995 | 90.66667 | 276.12547 |
| 90.75    | 256.88573 | 90.75    | 249.35512 | 90.75    | 255.73514 |
| 90.83333 | 261.56107 | 90.83333 | 267.99782 | 90.83333 | 265.1748  |
| 90.91667 | 263.14723 | 90.91667 | 253.85787 | 90.91667 | 273.50944 |
| 91       | 255.02248 | 91       | 259.67001 | 91       | 245.46909 |
| 91.08333 | 264.32391 | 91.08333 | 255.47593 | 91.08333 | 254.70992 |
| 91.16667 | 266.52223 | 91.16667 | 257.66303 | 91.16667 | 264.52944 |
| 91.25    | 258.34877 | 91.25    | 261.37559 | 91.25    | 255.62216 |
| 91.33333 | 253.76178 | 91.33333 | 258.03106 | 91.33333 | 262.67693 |
| 91.41667 | 265.02159 | 91.41667 | 264.74226 | 91.41667 | 251.74056 |
| 91.5     | 252.84827 | 91.5     | 253.11452 | 91.5     | 250.24671 |
| 91.58333 | 263.30785 | 91.58333 | 263.12643 | 91.58333 | 266.89489 |
| 91.66667 | 263.55586 | 91.66667 | 259.09517 | 91.66667 | 272.3602  |
| 91.75    | 255.89843 | 91.75    | 247.85196 | 91.75    | 244.6018  |
| 91.83333 | 256.2199  | 91.83333 | 252.31306 | 91.83333 | 264.6872  |
| 91.91667 | 258.08713 | 91.91667 | 259.78379 | 91.91667 | 264.40691 |

|          |           |          |           |          |           |
|----------|-----------|----------|-----------|----------|-----------|
| 92       | 260.64701 | 92       | 263.91031 | 92       | 263.21699 |
| 92.08333 | 262.90863 | 92.08333 | 268.36819 | 92.08333 | 258.48887 |
| 92.16667 | 256.24212 | 92.16667 | 258.926   | 92.16667 | 262.5221  |
| 92.25    | 255.97148 | 92.25    | 263.08442 | 92.25    | 246.85992 |
| 92.33333 | 259.10601 | 92.33333 | 259.63174 | 92.33333 | 258.89173 |
| 92.41667 | 263.65111 | 92.41667 | 259.59484 | 92.41667 | 268.32459 |
| 92.5     | 263.58314 | 92.5     | 263.70281 | 92.5     | 258.95647 |
| 92.58333 | 268.02378 | 92.58333 | 261.29424 | 92.58333 | 277.67934 |
| 92.66667 | 262.88923 | 92.66667 | 264.4592  | 92.66667 | 256.49918 |
| 92.75    | 259.0191  | 92.75    | 252.72416 | 92.75    | 252.38485 |
| 92.83333 | 253.02622 | 92.83333 | 244.82184 | 92.83333 | 258.37039 |
| 92.91667 | 257.64478 | 92.91667 | 262.58537 | 92.91667 | 252.45994 |
| 93       | 258.34214 | 93       | 254.65534 | 93       | 255.75432 |
| 93.08333 | 256.06909 | 93.08333 | 259.49581 | 93.08333 | 241.54255 |
| 93.16667 | 266.49066 | 93.16667 | 266.54049 | 93.16667 | 275.30857 |
| 93.25    | 257.63417 | 93.25    | 261.88642 | 93.25    | 265.22536 |
| 93.33333 | 266.07573 | 93.33333 | 271.17401 | 93.33333 | 250.49567 |

|          |           |          |           |          |           |
|----------|-----------|----------|-----------|----------|-----------|
| 93.41667 | 253.72317 | 93.41667 | 260.88273 | 93.41667 | 256.01226 |
| 93.5     | 258.25472 | 93.5     | 262.71995 | 93.5     | 255.71505 |
| 93.58333 | 259.08806 | 93.58333 | 259.85237 | 93.58333 | 249.08026 |
| 93.66667 | 253.33509 | 93.66667 | 254.59897 | 93.66667 | 242.24458 |
| 93.75    | 261.62999 | 93.75    | 251.64566 | 93.75    | 268.34498 |
| 93.83333 | 264.58921 | 93.83333 | 271.21346 | 93.83333 | 267.99474 |
| 93.91667 | 260.87564 | 93.91667 | 265.58757 | 93.91667 | 271.11944 |
| 94       | 254.24714 | 94       | 248.83702 | 94       | 250.53666 |
| 94.08333 | 260.59356 | 94.08333 | 253.46085 | 94.08333 | 270.35044 |
| 94.16667 | 266.72325 | 94.16667 | 269.17417 | 94.16667 | 276.04522 |
| 94.25    | 266.81678 | 94.25    | 261.91509 | 94.25    | 271.67125 |
| 94.33333 | 254.29671 | 94.33333 | 250.17405 | 94.33333 | 260.24929 |
| 94.41667 | 267.43653 | 94.41667 | 256.85327 | 94.41667 | 254.67286 |
| 94.5     | 253.34646 | 94.5     | 258.63887 | 94.5     | 261.54957 |
| 94.58333 | 263.50025 | 94.58333 | 263.40592 | 94.58333 | 250.72971 |
| 94.66667 | 265.5725  | 94.66667 | 262.40023 | 94.66667 | 255.10496 |
| 94.75    | 259.36287 | 94.75    | 251.56409 | 94.75    | 248.39131 |

|          |           |          |           |          |           |
|----------|-----------|----------|-----------|----------|-----------|
| 94.83333 | 259.6325  | 94.83333 | 260.75463 | 94.83333 | 269.38326 |
| 94.91667 | 257.39123 | 94.91667 | 247.64795 | 94.91667 | 259.33016 |
| 95       | 265.02423 | 95       | 268.26495 | 95       | 251.52999 |
| 95.08333 | 254.45655 | 95.08333 | 248.11015 | 95.08333 | 258.72811 |
| 95.16667 | 259.85712 | 95.16667 | 257.09952 | 95.16667 | 257.38562 |
| 95.25    | 264.9253  | 95.25    | 260.6502  | 95.25    | 259.62785 |
| 95.33333 | 263.7768  | 95.33333 | 260.0586  | 95.33333 | 270.58726 |
| 95.41667 | 257.88654 | 95.41667 | 260.59744 | 95.41667 | 247.05427 |
| 95.5     | 259.14865 | 95.5     | 262.87469 | 95.5     | 252.66967 |
| 95.58333 | 263.7568  | 95.58333 | 263.68611 | 95.58333 | 252.72306 |
| 95.66667 | 267.67073 | 95.66667 | 258.55574 | 95.66667 | 265.99485 |
| 95.75    | 254.8964  | 95.75    | 245.63933 | 95.75    | 258.50013 |
| 95.83333 | 260.77733 | 95.83333 | 253.21974 | 95.83333 | 255.28405 |
| 95.91667 | 257.75145 | 95.91667 | 258.58888 | 95.91667 | 256.43949 |
| 96       | 263.19552 | 96       | 265.08474 | 96       | 252.92985 |
| 96.08333 | 265.55874 | 96.08333 | 259.99449 | 96.08333 | 267.43491 |
| 96.16667 | 257.40478 | 96.16667 | 259.0357  | 96.16667 | 259.79736 |

|          |           |          |           |          |           |
|----------|-----------|----------|-----------|----------|-----------|
| 96.25    | 262.81552 | 96.25    | 261.23757 | 96.25    | 256.87746 |
| 96.33333 | 253.28563 | 96.33333 | 250.99162 | 96.33333 | 239.939   |
| 96.41667 | 263.65669 | 96.41667 | 258.15206 | 96.41667 | 261.2495  |
| 96.5     | 258.90321 | 96.5     | 262.22908 | 96.5     | 256.36519 |
| 96.58333 | 257.64218 | 96.58333 | 249.38913 | 96.58333 | 250.01262 |
| 96.66667 | 267.43729 | 96.66667 | 264.78805 | 96.66667 | 268.44766 |
| 96.75    | 267.13357 | 96.75    | 261.74468 | 96.75    | 259.00176 |
| 96.83333 | 254.65359 | 96.83333 | 256.56196 | 96.83333 | 241.39046 |
| 96.91667 | 254.23864 | 96.91667 | 252.72948 | 96.91667 | 254.75118 |
| 97       | 267.56578 | 97       | 269.3582  | 97       | 252.77046 |
| 97.08333 | 253.46396 | 97.08333 | 244.13116 | 97.08333 | 251.75004 |
| 97.16667 | 256.28825 | 97.16667 | 253.12771 | 97.16667 | 258.5828  |
| 97.25    | 257.21719 | 97.25    | 257.71954 | 97.25    | 241.89271 |
| 97.33333 | 262.37837 | 97.33333 | 252.0244  | 97.33333 | 260.83664 |
| 97.41667 | 261.82302 | 97.41667 | 256.8743  | 97.41667 | 262.34117 |
| 97.5     | 254.68107 | 97.5     | 248.25954 | 97.5     | 254.58786 |
| 97.58333 | 265.70103 | 97.58333 | 257.62531 | 97.58333 | 254.62395 |

|          |           |          |           |          |           |
|----------|-----------|----------|-----------|----------|-----------|
| 97.66667 | 259.37677 | 97.66667 | 253.64091 | 97.66667 | 258.25497 |
| 97.75    | 254.03197 | 97.75    | 249.70555 | 97.75    | 239.64563 |
| 97.83333 | 253.32917 | 97.83333 | 243.33306 | 97.83333 | 257.8587  |
| 97.91667 | 263.43792 | 97.91667 | 266.67584 | 97.91667 | 263.62523 |
| 98       | 264.40464 | 98       | 257.08036 | 98       | 270.22921 |
| 98.08333 | 265.16425 | 98.08333 | 261.61503 | 98.08333 | 268.83625 |
| 98.16667 | 268.26233 | 98.16667 | 270.74563 | 98.16667 | 277.4597  |
| 98.25    | 263.29707 | 98.25    | 261.98532 | 98.25    | 263.6978  |
| 98.33333 | 261.0412  | 98.33333 | 265.82739 | 98.33333 | 263.16425 |
| 98.41667 | 265.62383 | 98.41667 | 269.9891  | 98.41667 | 253.98738 |
| 98.5     | 256.01526 | 98.5     | 247.06625 | 98.5     | 254.77077 |
| 98.58333 | 260.45045 | 98.58333 | 265.74385 | 98.58333 | 259.41334 |
| 98.66667 | 266.10189 | 98.66667 | 256.24574 | 98.66667 | 273.25897 |
| 98.75    | 260.05271 | 98.75    | 249.99179 | 98.75    | 263.57565 |
| 98.83333 | 262.41489 | 98.83333 | 268.83907 | 98.83333 | 270.71901 |
| 98.91667 | 255.49644 | 98.91667 | 260.69528 | 98.91667 | 259.23026 |
| 99       | 256.97033 | 99       | 257.04819 | 99       | 243.41566 |

|          |           |          |           |          |           |
|----------|-----------|----------|-----------|----------|-----------|
| 99.08333 | 256.29853 | 99.08333 | 256.3339  | 99.08333 | 248.75592 |
| 99.16667 | 264.6599  | 99.16667 | 267.21783 | 99.16667 | 256.98873 |
| 99.25    | 267.94032 | 99.25    | 265.05701 | 99.25    | 275.00724 |
| 99.33333 | 265.35206 | 99.33333 | 256.87725 | 99.33333 | 263.11886 |
| 99.41667 | 266.53264 | 99.41667 | 256.26047 | 99.41667 | 270.47759 |
| 99.5     | 258.21585 | 99.5     | 253.7575  | 99.5     | 244.33391 |
| 99.58333 | 264.73005 | 99.58333 | 268.99035 | 99.58333 | 250.82272 |
| 99.66667 | 267.88935 | 99.66667 | 268.76508 | 99.66667 | 262.291   |
| 99.75    | 254.38403 | 99.75    | 259.0245  | 99.75    | 239.51961 |
| 99.83333 | 261.65028 | 99.83333 | 268.03036 | 99.83333 | 261.90879 |
| 99.91667 | 267.62916 | 99.91667 | 258.575   | 99.91667 | 255.32331 |
| 100      | 258.47488 | 100      | 263.41537 | 100      | 247.91024 |
